# Supplementary material
Source: PubMed Central journal article supplement (PMC9940717)
Supplement: 00274-2022.SUPPLEMENT.pdf [file 00274-2022.SUPPLEMENT.pdf]

# Characteristics and risk factors for post-COVID breathlessness following hospitalisation for COVID-19: Supplementary Material

## Contents

|                                                                                                     |    |
|-----------------------------------------------------------------------------------------------------|----|
| Details of the PHOSP-COVID Collaborative Group.....                                                 | 3  |
| PHOSP-COVID Collaborative Group.....                                                                | 3  |
| Supplementary material.....                                                                         | 13 |
| Subgroup analyses: discharge to review period.....                                                  | 23 |
| Sensitivity analyses: PSQ breathlessness at the research visit as a linear outcome.....             | 32 |
| Sensitivity analyses: PSQ breathlessness at the research visit as a binary outcome.....             | 33 |
| Sensitivity analyses: PSQ breathlessness at the research visit assessed in a multinomial model..... | 39 |
| Sensitivity analyses: Dyspnoea 12 score at the research visit as a linear outcome.....              | 40 |
| Reporting guidelines.....                                                                           | 42 |
| References.....                                                                                     | 45 |

## Figures

|                                                                                                                                                                                 |    |
|---------------------------------------------------------------------------------------------------------------------------------------------------------------------------------|----|
| Figure S1 Patient Symptom Questionnaire used to collect data on participant breathlessness in the PHOSP-COVID study.....                                                        | 13 |
| Figure S2 Breathlessness before COVID-19 and at the research visit stratified by sex, respiratory condition, depression/anxiety, and level of respiratory support received..... | 18 |
| Figure S3 Breathlessness before COVID-19 and at the research visit stratified by age at admission, deprivation, and ethnicity.....                                              | 19 |
| Figure S4 Receiver Operating Characteristic curve for post-COVID breathlessness logistic regression model.....                                                                  | 21 |
| Figure S5 Calibration plot for post-COVID breathlessness logistic regression model based on the first imputed dataset.....                                                      | 22 |
| Figure S6: Discharge date of study participants stratified by the period between discharge and research visit.....                                                              | 31 |
| Figure S7 Relationship of PSQ breathlessness and Dyspnoea 12 score collected at the research visit.....                                                                         | 40 |

## Tables

|                                                                                                                                                 |    |
|-------------------------------------------------------------------------------------------------------------------------------------------------|----|
| Table S1 Level of respiratory support received during hospitalization based on the World Health Organization clinical progression scale []..... | 14 |
| Table S2 Thresholds used to determine no, mild and severe post-COVID breathlessness.....                                                        | 14 |
| Table S3 Characteristics of included and excluded participants.....                                                                             | 15 |
| Table S4: Patient characteristics (stratified by discharge to review period).....                                                               | 23 |
| Table S5: Patient characteristics available during hospital admission (stratified by discharge to review period).....                           | 26 |
| Table S6: Patient characteristics available at the research visit (stratified by discharge to review period).....                               | 28 |
| Table S7 Linear regression model using breathlessness at research visit (PSQ) as the dependent variable.....                                    | 32 |
| Table S8 Patient characteristics stratified by breathlessness at the research visit (PSQ).....                                                  | 33 |
| Table S9 Patient characteristics available during hospital admission, stratified by breathlessness at the research visit (PSQ).....             | 34 |
| Table S10 Patient characteristics available at the research visit, stratified by breathlessness at the research visit (PSQ).....                | 35 |
| Table S11 Multivariable logistic regression with breathlessness at research visit (PSQ) as the dependent variable ..                            | 37 |
| Table S12 Multinomial logistic regression for PSQ breathlessness at the research visit.....                                                     | 39 |
| Table S13 Linear regression model - Dyspnoea 12 at the research visit.....                                                                      | 41 |
| Table S14 STROBE Statement—Checklist of items that should be included in reports of cohort studies [2].....                                     | 42 |
| Table S15 TRIPOD reporting guidelines checklist [3].....                                                                                        | 43 |

**Equations**

Equation S1 Equation for post-COVID breathlessness logistic regression model .....20

## **Details of the PHOSP-COVID Collaborative Group**

### **Writing Group**

Luke Daines, Bang Zheng, Omer Elneima, Ewen Harrison, Nazir I Lone, John R Hurst, Jeremy S Brown, Elizabeth Sapey, James D Chalmers, Jennifer K Quint, Samantha Walker, Paul Pfeffer, Salman Siddiqui, Hamish McAuley, Marco Sereno, Aarti Shikotra, Amisha Singapuri, Annemarie B Docherty, Michael Marks, Mark Toshner, Luke S Howard, Alex Horsley, Gisli Jenkins, Joanna C Porter, Ling-Pei Ho, Betty Raman, Louise V Wain, Christopher E Brightling, Rachael A Evans, Liam G Heaney, Anthony De Soyza, Aziz Sheikh.

## **PHOSP-COVID Collaborative Group**

### **Core Management Group**

*Chief Investigator* C E Brightling, *Members* R A Evans (Lead Co-I), L V Wain (Lead Co-I), J D Chalmers, V C Harris, L P Ho, A Horsley, M Marks, K Poinasamy, B Raman, A Shikotra, A Singapuri

### **PHOSP-COVID Study Central Coordinating Team**

C E Brightling (Chief Investigator), R A Evans (*Lead Co-I*), L V Wain (*Lead Co-I*), R Dowling, C Edwardson, O Elneima, S Finney, N J Greening, B Hargadon, V Harris, L Houchen,, O C Leavy, H J C McAuley, C Overton, T Plekhanova, R Saunders, M Sereno, A Singapuri, A Shikotra, C Taylor, S Terry, C Tong, B Zhao

### **Steering Committee**

*Co-chairs* D Lomas, E Sapey, *Institution representatives* C Berry, C E Bolton, N Brunskill, E R Chilvers, R Djukanovic, Y Ellis, D Forton, N French, J George, N A Hanley, N Hart, L McGarvey, N Maskell, H McShane, M Parkes, D Peckham, P Pfeffer, A Sayer, A Sheikh, A A R Thompson, N Williams and core management group representation

### **Executive Board**

*Chair* C E Brightling, representation from the core management group, each working group and platforms

## **Platforms**

### **Bioresource**

W Greenhalf (*Co-Lead*), M G Semple (*Co-Lead*), M Ashworth, H E Hardwick, M Sereno, R Saunders, A Singapuri, V Shaw, A Shikotra, L V Wain

### **Data Hub**

A B Docherty (*Co-Lead*), E M Harrison (*Co-Lead*), A Sheikh (*Co-Lead*), J K Baillie, C E Brightling, L Daines, R A Evans, S Kerr, O C Leavy, N I Lone, H J C McAuley, R Pius, J Quint, M Richardson, M Sereno, M Thorpe, L V Wain

### **Imaging Alliance**

M Halling-Brown (*Co-Lead*), F Gleeson (*Co-Lead*), J Jacob (*Co-Lead*), S Neubauer (*Co-Lead*) B Raman (*Co-Lead*)  
S Siddiqui (*Co-Lead*) J M Wild (*Co-Lead*), S Aslani, P Jezzard, H Lamlum, W Lilaonitkul, E Tunnicliffe, J  
Willoughby

### **Omics**

L V Wain (*Co-Lead*), J K Baillie (*Co-Lead*), H Baxendale, C E Brightling, M Brown, J D Chalmers, R A Evans, B  
Gooptu, W Greenhalf, H E Hardwick, R G Jenkins, D Jones, I Koychev, C Langenberg, A Lawrie, P L Molyneaux,  
A Shikotra, J Pearl, M Ralser, N Sattar, R Saunders, J T Scott, T Shaw, D Thomas, D Wilkinson

## **Working Groups**

### **Airways**

L G Heaney (*Co-Lead*), A De Soyza (*Co-Lead*), D Adeyoye, C E Brightling, J S Brown, J Busby, J D Chalmers, C  
Echevarria, L Daines, O Elneima, R A Evans, J Hurst, P Novotny, P Pfeffer, K Poinasamy, J Quint, I Rudan, E Sapey,  
A Sheikh, S Siddiqui, S Walker

### **Brain**

J R Geddes (*Lead*), M Hotopf (*Co-Lead*), K Abel, R Ahmed, L Allan, C Armour, D Baguley, D Baldwin, C Ballard,  
J Bambrough, K Bhui, G Breen, M Broome, T Brugha, E Bullmore, D Burn, J Cavanagh, T Chalder, D Clark, A  
David, B Deakin, H Dobson, B Elliott, J Evans, R Francis, E Guthrie, P Harrison, M Henderson, A Hosseini, N  
Huneke, M Husain, T Jackson, I Jones, T Kabir, P Kitterick, A Korszun, I Koychev, J Kwan, A Lingford-Hughes, C  
Mackay, P Mansoori, H McAllister-Williams, K McIvor, B Michael, L Milligan, R Morriss, E Mukaetova-Ladinska,  
T Nicholson, S Paddick, C Pariente, J Pimm, K Saunders, M Sharpe, G Simons, R Uptegrove, S Wessely

### **Cardiac**

G P McCann (*Lead*), C Antoniadis, R Bell, A Bularga, C Berry, K M Channon, P Chowienczyk, J P Greenwood, A  
Hingorani, A D Hughes, C Jolley, K Khunti, C Kotanidis, J Mayet, N L Mills, A J Moss, S Neubauer, D E Newby, B  
Raman, N Samani, A Saratzis, N Sattar, A M Shah, C L Sudlow, M Toshner, R Touyz, B Williams, C Xie

### **Immunology**

P J M Openshaw (*Lead*), D Altmann, J K Baillie, R Batterham, H Baxendale, N Bishop, C E Brightling, P C Calder,  
R A Evans, J L Heeney, T Hussell, P Klenerman, J M Lord, P Moss, S L Rowland-Jones, W Schwaeble, M G Semple,  
R S Thwaites, L Turtle, L V Wain, S Walmsley, D Wraith

### **Intensive Care**

M J Rowland (*Lead*), A Rostron (*Co-Lead*), J K Baillie, B Connolly, A B Docherty, N I Lone, D F McAuley, D  
Parekh, J Simpson, C Summers

### **Lung Fibrosis**

R G Jenkins (*Co-Lead*), J Porter (*Co-Lead*), R J Allen, R Aul, J K Baillie, S Barratt, P Beirne, J Blaikley, R C Chambers, N Chaudhuri, C Coleman, L Fabbri, P M George, M Gibbons, F Gleeson, B Gooptu, I Hall, N A Hanley, L P Ho, E Hufton, J Jacob, S Johnson, M Jones, S Jones, F Khan, J Mitchell, P L Molyneaux, J E Pearl, K Piper Hanley, K Poinasamy, J Quint, P Rivera-Ortega, M G Semple, J Simpson, M Spears, L G Spencer, S Stanel, I Stewart, D Thickett, R Thwaites, L V Wain, S Walker, S Walsh, J M Wild, D G Wootton, L Wright

### **Metabolic**

S Heller (*Co-Lead*), M Davies (*Co-Lead*), H Atkins, S Bain, J Dennis, K Ismail, D Johnston, P Kar, K Khunti, C Langenberg, P McArdle, A McGovern, T Peto, J Petrie, E Robertson, N Sattar, K Shah, J Valabhji, B Young

### **Pulmonary and Systematic Vasculature**

L Howard (*Co-Lead*), Mark Toshner (*Co-Lead*), C Berry, P Chowienczyk, D Lasserson, A Lawrie, O C Leavy, J Mitchell, L Price, J Quint, J Rossdale, N Sattar, C Sudlow, A A R Thompson, J M Wild, M Wilkins

### **Rehabilitation, Sarcopenia and Fatigue**

S J Singh (*Co-Lead*), W D-C Man (*Co-Lead*), J M Lord (*Co-Lead*), N J Greening (*Co-Lead*), T Chalder (*Co-Lead*), J T Scott (*Co-Lead*), N Armstrong, E Baldry, N Basu, M Beadsworth, L Bishop, C E Bolton, A Briggs, M Buch, G Carson, J Cavanagh, H Chinoy, E Daynes, S Defres, R A Evans, P Greenhaff, S Greenwood, M Harvie, M Husain, A McArdle, A McMahan, M McNarry, C Nolan, J Pimm, J Sargent, L Sigfrid, M Steiner, D Stensel, A L Tan, J Whitney, D Wilkinson, D Wilson, M Witham, D G Wootton, T Yates

### **Renal**

D Thomas (*Lead*), N Brunskill (*Co-Lead*), S Francis (*Co-Lead*), S Greenwood (*Co-Lead*), C Laing (*Co-Lead*), K Bramham, P Chowdhury, A Frankel, L Lightstone, S McAdoo, K McCafferty, M Ostermann, N Selby, C Sharpe, M Willicombe

### **Local Clinical Centre PHOSP-COVID trial staff**

(listed in alphabetical order)

#### **Airedale NHS Foundation Trust**

A Shaw (PI), L Armstrong, B Hairsine, H Henson, C Kurasz, L Shenton

#### **Aneurin Bevan University Health Board**

S Fairbairn (PI), A Dell, N Hawkings, J Haworth, M Hoare, A Lucey, V Lewis, G Mallison, H Nassa, C Pennington, A Price, C Price, A Storrie, G Willis, S Young

#### **Barts Health NHS Trust & Queen Mary University of London**

P Pfeffer (PI), K Chong-James, C David, W Y James, A Martineau, O Zongo

**Barnsley Hospital NHS Foundation Trust**

A Sanderson (PI)

**Belfast Health and Social Care Trust & Queen's University Belfast**

L G Heaney (PI), C Armour, V Brown, T Craig, S Drain, B King, N Magee, D McAulay, E Major, L McGarvey, J McGinness, R Stone

**Betsi Cadwaladr University Health Board**

A Haggart (PI), A Bolger, F Davies, J Lewis, A Lloyd, R Manley, E McIvor, D Menzies, K Roberts, W Saxon, D Southern, C Subbe, V Whitehead

**Borders General Hospital, NHS Borders**

H El-Taweel (PI), J Dawson, L Robinson

**Bradford Teaching Hospitals NHS Foundation Trust**

D Saralaya (PI), L Brear, K Regan, K Storton

**Cambridge University Hospitals NHS Foundation Trust, NIHR Cambridge Clinical Research Facility & University of Cambridge**

J Fuld (PI), A Bermperri, I Cruz, K Dempsey, A Elmer, H Jones, S Jose, S Marciniak, M Parkes, C Ribeiro, J Taylor, M Toshner, L Watson, J Worsley

**Cardiff and Vale University Health Board**

R Sabit (PI), L Broad, A Buttress, T Evans, M Haynes, L Jones, L Knibbs, A McQueen, C Oliver, K Paradowski, J Williams

**Chesterfield Royal Hospital NHS Trust**

E Harris (PI), C Sampson

**Cwm Taf Morgannwg University Health Board**

C Lynch (PI), E Davies, C Evenden, A Hancock, K Hancock, M Rees, L Roche, N Stroud, T Thomas-Woods

**East Cheshire NHS Trust**

M Babores (PI), J Bradley-Potts, M Holland, N Keenan, S Shashaa, H Wassall

**East Kent Hospitals University NHS Foundation Trust**

E Beranova (PI), H Weston (PI), T Cosier, L Austin, J Deery, T Hazelton, C Price, H Ramos, R Solly, S Turney

**Gateshead NHS Trust**

L Pearce (PI), W McCormack, S Pugmire, W Stoker, A Wilson

**Guy's and St Thomas' NHS Foundation Trust**

N Hart (PI), LA Aguilar Jimenez, G Arbane, S Betts, K Bisnauthsing, A Dewar, P Chowdhury, A Dewar, G Kaltsakas, H Kerslake, MM Magtoto, P Marino, LM Martinez, M Ostermann, J Rossdale, TS Solano, E Wynn

**Hampshire Hospitals NHS Foundation Trust**

N Williams (PI), W Storrar (PI), M Alvarez Corral, A Arias, E Bevan, D Griffin, J Martin, J Owen, S Payne, A Prabhu, A Reed, C Wrey Brown

**Harrogate and District NHD Foundation Trust**

C Lawson (PI), T Burdett, J Featherstone, A Layton, C Mills, L Stephenson,

**Hull University Teaching Hospitals NHS Trust & University of Hull**

N Easom (PI), P Atkin, K Brindle, M G Crooks, K Drury, R Flockton, L Holdsworth, A Richards, D L Sykes, S Thackray-Nocera, C Wright

**Hywel Dda University Health Board**

K E Lewis (PI), A Mohamed (PI), G Ross (PI), S Coetzee, K Davies, R Hughes, R Loosley, L O'Brien, Z Omar, H McGuinness, E Perkins, J Phipps, A Taylor, H Tench, R Wolf-Roberts

**Imperial College Healthcare NHS Trust & Imperial College London**

L Howard (PI), O Kon (PI), D C Thomas (PI), S Anifowose, L Burden, E Calvelo, B Card, C Carr, E R Chilvers, D Copeland, P Cullinan, P Daly, L Evison, T Fayzan, H Gordon, S Haq, R G Jenkins, C King, K March, M Mariveles, L McLeavey, N Mohamed, S Moriera, U Munawar, J Nunag, U Nwanguma, L Orriss- Dib, A Ross, M Roy, E Russell, K Samuel, J Schronce, N Simpson, L Tarusan, C Wood, N Yasmin

**Kettering General Hospital NHS Trust**

R Reddy (PI), A-M, Guerdetto, M Hewitt, K Warwick, S White

**King's College Hospital NHS Foundation Trust & Kings College London**

A M Shah (PI), C J Jolley (PI), O Adeyemi, R Adrego, H Assefa-Kebede, J Breeze, M Brown, S Byrne, T Chalder, P Dulawan, N Hart, A Hayday, A Hoare, A Knighton, M Malim, S Patale, I Peralta, N Powell, A Ramos, K Shevket, F Speranza, A Te

**Leeds Teaching Hospitals & University of Leeds**

P Beirne (PI), A Ashworth, J Clarke, C Coupland, M Dalton, E Wade, C Favager, J Greenwood, J Glossop, L Hall, T Hardy, A Humphries, J Murira, D Peckham, S Plein, J Rangeley, G Saalmink, A L Tan, B Whittam, N Window, J Woods

**Lewisham & Greenwich NHS Trust**

G Coakley (PI)

**Liverpool University Hospitals NHS Foundation Trust & University of Liverpool**

D G Wootton (PI), L Turtle (PI), L Allerton, AM All, M Beadsworth, A Berridge, J Brown, S Cooper, A Cross, S Defres, S L Dobson, J Earley, N French, W Greenhalf, H E Hardwick, K Hainey, J Hawkes, V Highett, S Kaprowska, AL Key, L Lavelle-Langham, N Lewis-Burke, G Madzamba, F Malein, S Marsh, C Mears, L Melling, M J Noonan, L Poll, J Pratt, E Richardson, A Rowe, M G Semple, V Shaw, K A Tripp, L O Wajero, S A Williams-Howard, J Wyles,

**London North West University Healthcare NHS Trust**

S N Diwanji (PI), P Papineni (PI), S Gurram, S Quaid, G F Tiongson, E Watson

**Manchester University NHS Foundation Trust & University of Manchester**

B Al-Shekly (PI), A Horsley (PI), C Avram, J Blaikely, M Buch, N Choudhury, D Faluyi, T Felton, T Gorsuch, N A Hanley, T Hussell, Z Kausar, N Odell, R Osbourne, K Piper Hanley, K Radhakrishnan, S Stockdale

**Newcastle upon Tyne Hospitals NHS Foundation Trust & University of Newcastle**

A De Soyza (PI), C Echevarria (PI), A Ayoub, J Brown, G Burns, G Davies, H Fisher, C Francis, A Greenhalgh, P Hogarth, J Hughes, K Jiwa, G Jones, G MacGowan, D Price, A Sayer, J Simpson, H Tedd, S Thomas, S West, M Witham, S Wright, A Young

**NHS Dumfries and Galloway**

M J McMahon (PI), P Neill

**NHS Greater Glasgow and Clyde Health Board & University of Glasgow**

D Anderson (PI), H Bayes (PI), C Berry (PI), D Grieve (PI), I B McInnes (PI), N Basu, A Brown, A Dougherty, K Fallon, L Gilmour, K Mangion, A Morrow, K Scott, R Sykes

**NHS Highland**

E K Sage (PI), F Barrett, A Donaldson

**NHS Lanarkshire**

M Patel (PI), D Bell, A Brown, M Brown, R Hamil, K Leitch, L Macliver, J Quigley, A Smith, B Welsh

**NHS Lothian & University of Edinburgh**

G Choudhury (PI), J K Baillie, S Clohisey, A Deans, A B Docherty, J Furniss, E M Harrison, S Kelly, N I Lone, A Sheikh

**NHS Tayside & University of Dundee**

J D Chalmers (PI), D Connell, A Elliott, C Deas, J George, S Mohammed, J Rowland, A R Solstice, D Sutherland, C J Tee

**North Bristol NHS Trust & University of Bristol**

N Maskell (PI), D Arnold, S Barrett, H Adamali, A Dipper, S Dunn, A Morley, L Morrison, L Stadon, S Waterson, H Welch



**North Middlesex Hospital NHS Trust**

B Jayaraman (PI), T Light

**Nottingham University Hospitals NHS Trust & University of Nottingham**

C E Bolton (PI), P Almeida, J Bonnington, M Chrystal, P Greenhaff, A Gupta, L Howard, S Linford, L Matthews, R Needham, K Shaw, A K Thomas

**Oxford University Hospitals NHS Foundation Trust & University of Oxford**

L P Ho (PI), N M Rahman (PI), M Ainsworth, A Alamoudi, A Bates, A Bloss, A Burns, P Carter, J Chen, F Conneh, T Dong, R I Evans, E Fraser, X Fu, J R Geddes, F Gleeson, P Harrison, M Havinden-Williams, P Jezzard, N Kanellakis, I Koychev, P Kurupati, X Li, H McShane, C Megson, K Motohashi, S Neubauer, D Nicoll, G Ogg, E Pacpaco, M Pavlides, Y Peng, N Petousi, N Rahman, B Raman, M J Rowland, K Saunders, M Sharpe, N Talbot, E Tunnicliffe

**Royal Brompton and Harefield Clinical Group, Guy's and St Thomas' NHS Foundation Trust.**

W Man (PI), B Patel (PI), R E Barker, D Cristiano, N Dormand, M Gummadi, S Kon, K Liyanage, C M Nolan, S Patel, O Polgar, P Shah, S J Singh, J A Walsh

**Royal Free London NHS Foundation Trust**

J Hurst (PI), H Jarvis (PI), S Mandal (PI), S Ahmad, S Brill, L Lim, D Matila, O Olaosebikan, C Singh

**Royal Papworth Hospital NHS Foundation Trust**

M Toshner (PI), H Baxendale, L Garner, C Johnson, J Mackie, A Michael, J Pack, K Paques, H Parfrey, J Parmar

**Salford Royal NHS Foundation Trust**

N Diar Bakerly (PI), P Dark, D Evans, E Hardy, A Harvey, D Holgate, S Knight, N Mairs, N Majeed, L McMorrow, J Oxtan, J Pendlebury, C Summersgill, R Ugwuoke, S Whittaker

**Salisbury NHS Foundation Trust**

W Matimba-Mupaya (PI), S Strong-Sheldrake

**Sheffield Teaching NHS Foundation Trust & University of Sheffield**

S Rowland-Jones (PI), A A R Thompson (Co PI), J Bagshaw, M Begum, K Birchall, R Butcher, H Carborn, F Chan, K Chapman, Y Cheng, L Chetham, C Clark, Z Coburn, J Cole, M Dixon, A Fairman, J Finnigan, H Foot, D Foote, A Ford, R Gregory, K Harrington, L Haslam, L Hesselden, J Hockridge, A Holbourn, B Holroyd-Hind, L Holt, A Howell, E Hurditch, F Ilyas, C Jarman, A Lawrie, E Lee, J-H Lee, R Lenagh, A Lye, I Macharia, M Marshall, A Mbuyisa, J McNeill, S Megson, J Meiring, L Milner, S Misra, H Newell, T Newman, C Norman, L Nwafor, D Pattenadk, M Plowright, J Porter, P Ravencroft, C Roddis, J Rodger, P Saunders, J Sidebottom, J Smith, L Smith, N Steele, G Stephens, R Stimpson, B Thamu, N Tinker, K Turner, H Turton, P Wade, S Walker, J Watson, I Wilson, A Zawia

**St George's University Hospitals NHS Foundation Trust**

R Aul (PI), M Ali, A Dunleavy (PI), D Forton, N Msimanga, M Mencias, T Samakomva, S Siddique, J Teixeira, V Tavoukjian

**Sherwood Forest Hospitals NHS Foundation Trust**

J Hutchinson (PI), L Allsop, K Bennett, P Buckley, M Flynn, M Gill, C Goodwin, M Greatorex, H Gregory, C Heeley, L Holloway, M Holmes, J Kirk, W Lovegrove, TA Sewell, S Shelton, D Sissons, K Slack, S Smith, D Sowter, S Turner, V Whitworth, I Wynter

**Shropshire Community Health NHS Trust**

L Warburton (PI), S Painter, J Tomlinson

**Somerset NHS Foundation Trust**

C Vickers (PI), T Wainwright, D Redwood, J Tilley, S Palmer

**Swansea Bay University Health Board**

G A Davies (PI), L Connor, A Cook, T Rees, F Thaivalappil, C Thomas

**Tameside and Glossop Integrated Care NHS Foundation**

A Butt (PI), M Coulding, H Jones, S Kilroy, J McCormick, J McIntosh, H Savill, V Turner, J Vere

**The Great Western Hospital Foundation Trust**

E Fraile (PI), J Ugoji

**The Hillingdon Hospitals NHS Foundation Trust**

S S Kon (PI), H Lota, G Landers, M Nasser, S Portukhay

**The Rotherham NHS Foundation Trust**

A Hormis (PI), A Daniels, J Ingham, L Zeidan

**United Lincolnshire Hospitals NHS Trust**

M Chablani (PI), L Osborne

**University College London Hospital & University College London**

M Marks (PI), J S Brown (PI), N Ahwireng, B Bang, D Basire, R C Chambers, A Checkley, R Evans, M Heightman, T Hillman, J Hurst, J Jacob, S Janes, R Jastrub, M Lipman, S Logan, D Lomas, M Merida Morillas, H Plant, J C Porter, K Roy, E Wall

**University Hospital Birmingham NHS Foundation Trust & University of Birmingham**

D Parekh (PI), N Ahmad Haider, C Atkin, R Baggott, M Bates, A Botkai, A Casey, B Cooper, J Dasgin, K Draxlbauer, N Gautam, J Hazeldine, T Hiwot, S Holden, K Isaacs, T Jackson, S Johnson, V Kamwa, D Lewis, J M Lord, S Madathil, C McGhee, K McGee, A Neal, A Newton Cox, J Nyaboko, D Parekh, Z Peterkin, H Qureshi, L Ratcliffe, E Sapey, J Short, T Soulsby, J Stockley, Z Suleiman, T Thompson, M Ventura, S Walder, C Welch, D Wilson, S Yasmin, K P Yip

**University Hospitals of Derby and Burton**

P Beckett (PI) C Dickens, U Nanda

**University Hospitals of Leicester NHS Trust & University of Leicester**

C E Brightling (CI), R A Evans (PI), M Aljaroof, N Armstrong, H Arnold, H Aung, M Bakali, M Bakau, M Bingham, M Bourne, C Bourne, N Brunskill, P Cairns, L Carr, A Charalambou, C Christie, M Davies, S Diver, S Edwards, C Edwardson, O Elneima, H Evans, J Finch, S Glover, N Goodman, B Gootpu, N J Greening, K Hadley, P Haldar, B Hargadon, V C Harris, L Houchen, W Ibrahim, L Ingram, K Khunti, A Lea, D Lee, G P McCann, H J C McAuley, P McCourt, T McNally, A Moss, W Monteiro, M Pareek, S Parker, A Rowland, A Prickett, I N Qureshi, R Russell, M Sereno, A Shikotra, S Siddiqui, A Singapuri, S J Singh, J Skeemer, M Soares, E Stringer, T Thornton, M Tobin, L V Wain, T J C Ward, F Woodhead, T Yates, A Yousuf

**University Hospital Southampton NHS Foundation Trust & University of Southampton**

M Jones (PI), C Childs, R Djukanovic, S Fletcher, M Harvey, E Marouzet, B Marshall, R Samuel, T Sass, T Wallis, H Wheeler

**Whittington Health NHS**

R Dharmaganawardena (PI), E Bright, P Crisp, M Stern

**Wirral University Teaching Hospital**

A Wight (PI), L Bailey, A Reddington

**Wrightington Wigan and Leigh NHS trust**

A Ashish (PI), J Cooper, E Robinson

**Yeovil District Hospital NHS Foundation Trust**

A Broadley (PI)

**York & Scarborough NHS Foundation Trust**

K Howard (PI), L Barman, C Brookes, K Elliott, L Griffiths, Z Guy, D Ionita, H Redfearn, C Sarginson  
A Turnbull

**Health and Care Research Wales**

Y Ellis

**London School of Hygiene & Tropical Medicine (LSHTM)**

M Marks, A Briggs

**NIHR Office for Clinical Research Infrastructure**

K Holmes

**Patient Public Involvement Leads**

Asthma UK and British Lung Foundation Partnership - K Poinasamy, S Walker

**Royal Surrey NHS Foundation Trust**

M Halling-Brown

**South London and Maudsley NHS Foundation Trust & Kings College London**  
G Breen, M Hotopf

**Swansea University & Swansea Welsh Network**  
K Lewis, N Williams

Supplementary material

Figure S1 Patient Symptom Questionnaire used to collect data on participant breathlessness in the PHOSP-COVID study

|                                                                                                                                                                                                                                                                                                                                                                                                                                                                                            |                                                        |                            |                          |                                                                                                 |
|--------------------------------------------------------------------------------------------------------------------------------------------------------------------------------------------------------------------------------------------------------------------------------------------------------------------------------------------------------------------------------------------------------------------------------------------------------------------------------------------|--------------------------------------------------------|----------------------------|--------------------------|-------------------------------------------------------------------------------------------------|
| <p><b>Please complete the following questionnaire</b><br/>         If anything is unclear or there is something you are concerned about, please discuss this with your clinician or nurse during your appointment.</p>                                                                                                                                                                                                                                                                     |                                                        |                            |                          |                                                                                                 |
| <p>a) Do you feel fully recovered from COVID-19? <input type="checkbox"/> Yes <input type="checkbox"/> No <input type="checkbox"/> Not sure</p>                                                                                                                                                                                                                                                                                                                                            |                                                        |                            |                          |                                                                                                 |
| <p><b>We would like to understand more about your symptoms. For each symptom below (b to f), Please rate them before you had COVID-19, in general since you had COVID-19 and the worst you have felt in the past 24 hours.</b></p> <p><b>Please rate them on a scale 0-10 where:</b></p> <p style="text-align: center;">← 0    1    2    3    4    5    6    7    8    9    10</p> <p style="text-align: center;">NEUTRAL    SLIGHT SENSATION    ANNOYING    DISTRESSING    UNBEARABLE</p> |                                                        |                            |                          |                                                                                                 |
|                                                                                                                                                                                                                                                                                                                                                                                                                                                                                            | <b>Please rate these symptoms on a scale of 0 - 10</b> |                            |                          | Please also try to indicate if the symptom is staying the same, getting better or getting worse |
|                                                                                                                                                                                                                                                                                                                                                                                                                                                                                            | i) Before you had COVID-19                             | ii) Since you had COVID-19 | iii) Worst in last 24hrs | iv) Trajectory                                                                                  |
| <b>b) Breathlessness</b>                                                                                                                                                                                                                                                                                                                                                                                                                                                                   |                                                        |                            |                          | <input type="checkbox"/> Same <input type="checkbox"/> Better <input type="checkbox"/> Worse    |
| <b>c) Cough</b>                                                                                                                                                                                                                                                                                                                                                                                                                                                                            |                                                        |                            |                          | <input type="checkbox"/> Same <input type="checkbox"/> Better <input type="checkbox"/> Worse    |
| <b>d) Fatigue</b>                                                                                                                                                                                                                                                                                                                                                                                                                                                                          |                                                        |                            |                          | <input type="checkbox"/> Same <input type="checkbox"/> Better <input type="checkbox"/> Worse    |
| <b>e) Sleep quality</b>                                                                                                                                                                                                                                                                                                                                                                                                                                                                    |                                                        |                            |                          | <input type="checkbox"/> Same <input type="checkbox"/> Better <input type="checkbox"/> Worse    |
| <b>f) Pain</b>                                                                                                                                                                                                                                                                                                                                                                                                                                                                             |                                                        |                            |                          | <input type="checkbox"/> Same <input type="checkbox"/> Better <input type="checkbox"/> Worse    |

**Table S1 Level of respiratory support received during hospitalization based on the World Health Organization clinical progression scale [1]**

| Levels | Definition                                                                                                    |
|--------|---------------------------------------------------------------------------------------------------------------|
| 3-4    | Not requiring continuous supplemental oxygen                                                                  |
| 5      | Continuous supplemental oxygen only                                                                           |
| 6      | Continuous Positive Airway Pressure ventilation, Bi-Level Positive Airway Pressure or High Flow Nasal Oxygen. |
| 7-9    | Invasive Mechanical Ventilation, Extra-Corporeal Membrane Oxygenation and acute Renal Replacement Therapy.    |

**Table S2 Thresholds used to determine no, mild and severe post-COVID breathlessness**

To investigate potential differences between individuals according to the severity of post-COVID breathlessness, multinomial modelling was used. Using the change in PSQ breathlessness score at the time of the research visit compared to before COVID-19, we created a categorical (ordinal) variable using the following thresholds:

| Post-COVID breathlessness: Levels | Definition              |
|-----------------------------------|-------------------------|
| No                                | Change in PSQ $\leq 0$  |
| Yes: Mild                         | Change in PSQ = 1 or 2. |
| Yes: Severe                       | Change in PSQ $\geq 3$  |

**Table S3 Characteristics of included and excluded participants**

Of the 1,843 individuals who completed a research visit between 1 and 8 months, 617 had missing data for breathlessness before COVID-19 or breathlessness at the first research assessment and were therefore excluded from this analysis.

|                               | Total N      | Levels             | Eligible for inclusion |             | Total       |
|-------------------------------|--------------|--------------------|------------------------|-------------|-------------|
|                               |              |                    | No                     | Yes         |             |
| Total N (%)                   |              |                    | 617 (33.5)             | 1226 (66.5) | 1843        |
| Age at admission (years)      | 1824 (99.0)  | 50-59              | 157 (25.4)             | 354 (28.9)  | 511 (27.7)  |
|                               |              | <30                | 21 (3.4)               | 25 (2.0)    | 46 (2.5)    |
|                               |              | 30-39              | 36 (5.8)               | 79 (6.4)    | 115 (6.2)   |
|                               |              | 40-49              | 87 (14.1)              | 190 (15.5)  | 277 (15.0)  |
|                               |              | 60-69              | 185 (30.0)             | 357 (29.1)  | 542 (29.4)  |
|                               |              | 70-79              | 108 (17.5)             | 168 (13.7)  | 276 (15.0)  |
|                               |              | 80+                | 17 (2.8)               | 40 (3.3)    | 57 (3.1)    |
|                               |              | (Missing)          | 6 (1.0)                | 13 (1.1)    | 19 (1.0)    |
| Sex at birth                  | 1843 (100.0) | Male               | 372 (60.3)             | 768 (62.6)  | 1140 (61.9) |
|                               |              | Female             | 245 (39.7)             | 458 (37.4)  | 703 (38.1)  |
| Ethnicity                     | 1800 (97.7)  | White              | 440 (71.3)             | 873 (71.2)  | 1313 (71.2) |
|                               |              | South Asian        | 74 (12.0)              | 153 (12.5)  | 227 (12.3)  |
|                               |              | Black              | 47 (7.6)               | 92 (7.5)    | 139 (7.5)   |
|                               |              | Mixed              | 9 (1.5)                | 33 (2.7)    | 42 (2.3)    |
|                               |              | Other              | 27 (4.4)               | 52 (4.2)    | 79 (4.3)    |
|                               |              | (Missing)          | 20 (3.2)               | 23 (1.9)    | 43 (2.3)    |
| Index of multiple deprivation | 1811 (98.3)  | 1 - most deprived  | 120 (19.4)             | 266 (21.7)  | 386 (20.9)  |
|                               |              | 2                  | 165 (26.7)             | 266 (21.7)  | 431 (23.4)  |
|                               |              | 3                  | 99 (16.0)              | 228 (18.6)  | 327 (17.7)  |
|                               |              | 4                  | 105 (17.0)             | 214 (17.5)  | 319 (17.3)  |
|                               |              | 5 - least deprived | 118 (19.1)             | 230 (18.8)  | 348 (18.9)  |

|                                     | Total N      | Levels          | Eligible for inclusion |                   | Total             |
|-------------------------------------|--------------|-----------------|------------------------|-------------------|-------------------|
|                                     |              |                 | No                     | Yes               |                   |
|                                     |              | (Missing)       | 10 (1.6)               | 22 (1.8)          | 32 (1.7)          |
| BMI                                 | 1509 (81.9)  | Mean (SD)       | 32.1 (7.1)             | 32.0 (7.1)        | 32.1 (7.1)        |
| Smoking                             | 1622 (88.0)  | Never           | 217 (35.2)             | 689 (56.2)        | 906 (49.2)        |
|                                     |              | Ex-smoker       | 181 (29.3)             | 506 (41.3)        | 687 (37.3)        |
|                                     |              | Current smoker  | 11 (1.8)               | 18 (1.5)          | 29 (1.6)          |
|                                     |              | (Missing)       | 208 (33.7)             | 13 (1.1)          | 221 (12.0)        |
| Number of comorbidities             | 1843 (100.0) | Median (IQR)    | 2.0 (1.0 to 3.0)       | 2.0 (0.0 to 3.0)  | 2.0 (1.0 to 3.0)  |
| Cardiovascular                      | 1843 (100.0) | No              | 310 (50.2)             | 679 (55.4)        | 989 (53.7)        |
|                                     |              | Yes             | 307 (49.8)             | 547 (44.6)        | 854 (46.3)        |
| Respiratory                         | 1843 (100.0) | No              | 442 (71.6)             | 893 (72.8)        | 1335 (72.4)       |
|                                     |              | Yes             | 175 (28.4)             | 333 (27.2)        | 508 (27.6)        |
| Depression or anxiety               | 1821 (98.8)  | No              | 498 (80.7)             | 1009 (82.3)       | 1507 (81.8)       |
|                                     |              | Yes             | 116 (18.8)             | 198 (16.2)        | 314 (17.0)        |
| <b>During hospital admission</b>    |              |                 |                        |                   |                   |
| Admission duration (days)           | 1841 (99.9)  | Median (IQR)    | 7.0 (4.0 to 14.0)      | 8.0 (4.0 to 17.0) | 8.0 (4.0 to 16.0) |
| WHO clinical progression scale      | 1843 (100.0) | WHO – class 3-4 | 93 (15.1)              | 223 (18.2)        | 316 (17.1)        |
|                                     |              | WHO – class 5   | 276 (44.7)             | 477 (38.9)        | 753 (40.9)        |
|                                     |              | WHO – class 6   | 155 (25.1)             | 256 (20.9)        | 411 (22.3)        |
|                                     |              | WHO – class 7-9 | 93 (15.1)              | 270 (22.0)        | 363 (19.7)        |
| Prone during mechanical ventilation | 1683 (91.3)  | No              | 485 (78.6)             | 892 (72.8)        | 1377 (74.7)       |
|                                     |              | Yes             | 96 (15.6)              | 210 (17.1)        | 306 (16.6)        |
|                                     |              | (Missing)       | 36 (5.8)               | 124 (10.1)        | 160 (8.7)         |
| Pulmonary Embolism                  | 1737 (94.2)  | No              | 534 (86.5)             | 1025 (83.6)       | 1559 (84.6)       |
|                                     |              | Yes             | 57 (9.2)               | 121 (9.9)         | 178 (9.7)         |
|                                     |              | (Missing)       | 26 (4.2)               | 80 (6.5)          | 106 (5.8)         |
| Coronary thrombosis                 | 1729 (93.8)  | No              | 587 (95.1)             | 1135 (92.6)       | 1722 (93.4)       |



|                                   | Total N     | Levels    | Eligible for inclusion |            | Total       |
|-----------------------------------|-------------|-----------|------------------------|------------|-------------|
|                                   |             |           | No                     | Yes        |             |
|                                   |             | Yes       | <5 (-)                 | <5 (-)     | 7 (0.4)     |
|                                   |             | (Missing) | - (-)                  | - (-)      | 114 (6.2)   |
| Antibiotic therapy                | 1789 (97.1) | No        | 118 (19.1)             | 236 (19.2) | 354 (19.2)  |
|                                   |             | Yes       | 484 (78.4)             | 951 (77.6) | 1435 (77.9) |
|                                   |             | (Missing) | 15 (2.4)               | 39 (3.2)   | 54 (2.9)    |
| Systemic steroids (Oral or IV)    | 1738 (94.3) | No        | 258 (41.8)             | 613 (50.0) | 871 (47.3)  |
|                                   |             | Yes       | 336 (54.5)             | 531 (43.3) | 867 (47.0)  |
|                                   |             | (Missing) | 23 (3.7)               | 82 (6.7)   | 105 (5.7)   |
| Therapeutic dose anti-coagulation | 1740 (94.4) | No        | 344 (55.8)             | 685 (55.9) | 1029 (55.8) |
|                                   |             | Yes       | 246 (39.9)             | 465 (37.9) | 711 (38.6)  |
|                                   |             | (Missing) | 27 (4.4)               | 76 (6.2)   | 103 (5.6)   |

**Figure S2 Breathlessness before COVID-19 and at the research visit stratified by sex, respiratory condition, depression/anxiety, and level of respiratory support received**

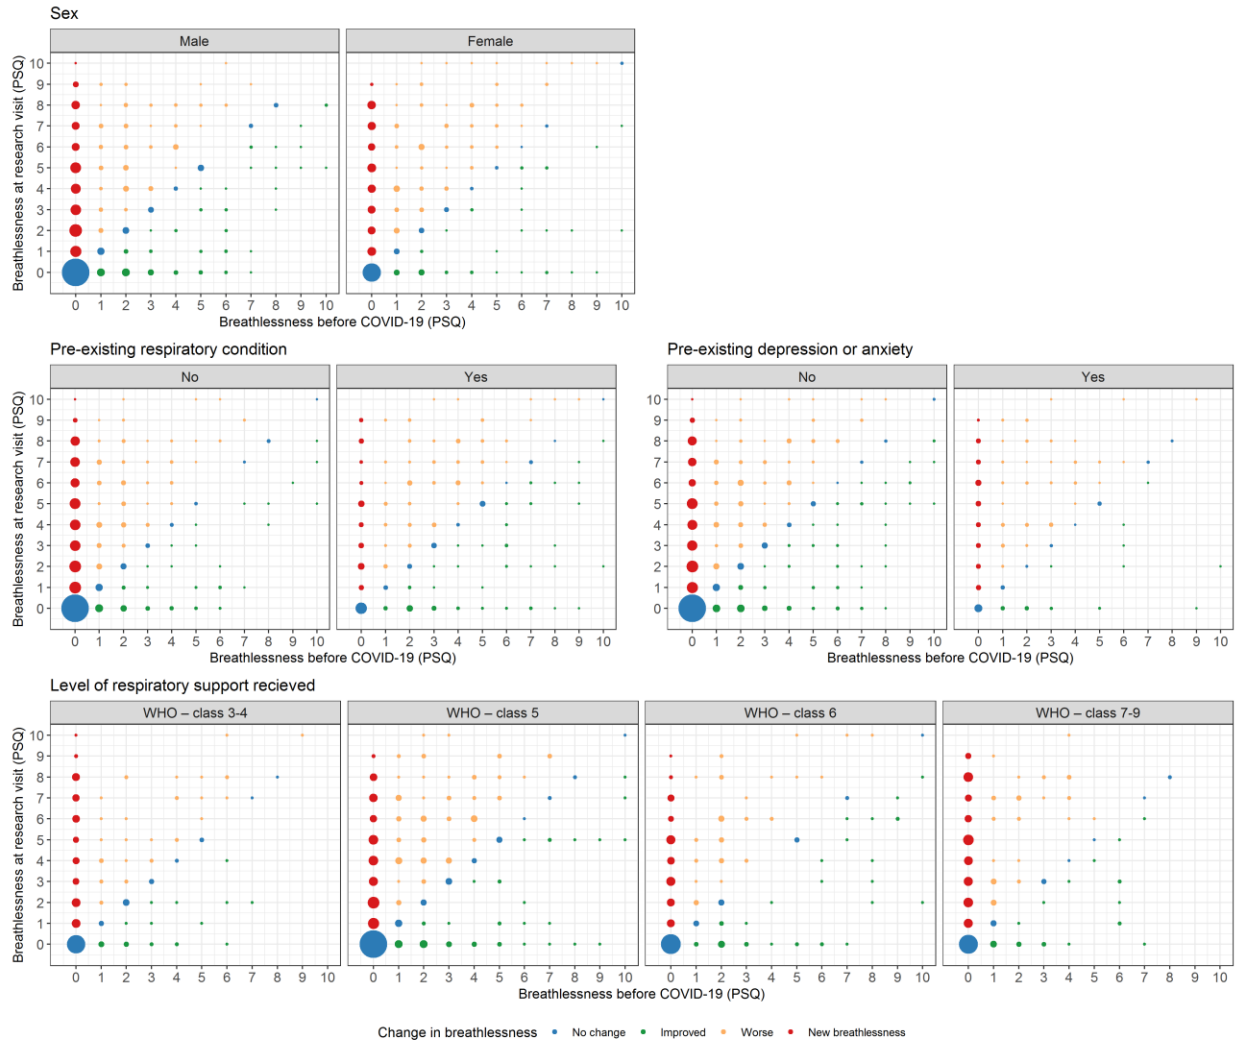

**Figure S3 Breathlessness before COVID-19 and at the research visit stratified by age at admission, deprivation, and ethnicity**

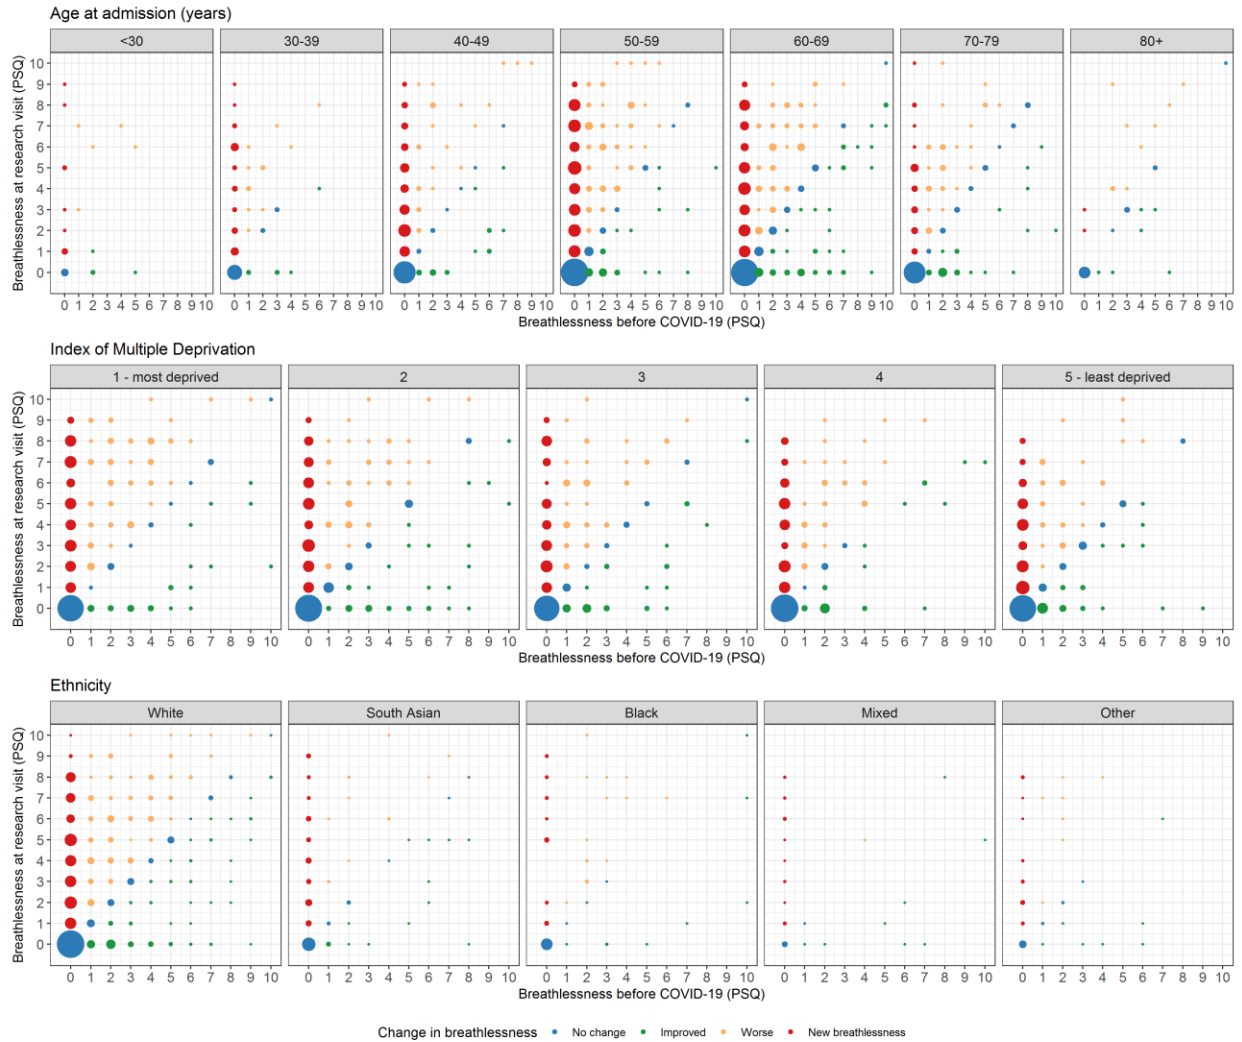

### Equation S1 Equation for post-COVID breathlessness logistic regression model

$$\ln\left(\frac{p(\text{post-COVID breathlessness})}{1 - p(\text{post-COVID breathlessness})}\right) = -1.75 + 0.44(\text{Female}) + 0.30(\text{age} < 30) - 0.15(\text{age } 30 \text{ to } 39) - 0.04(\text{age } 40 \text{ to } 49) - 0.36(\text{age } 50 \text{ to } 59) \\ - 0.85(\text{age } 70 \text{ to } 79) - 1.18(\text{age} \geq 80) + 0.20(\text{IMD } 4) + 0.19(\text{IMD } 3) + 0.18(\text{IMD } 2) + 0.51(\text{IMD } 1) - 0.22(\text{Ethnicity South Asian}) \\ - 0.59(\text{Ethnicity Black}) - 0.16(\text{Ethnicity Mixed}) - 0.23(\text{Ethnicity Other}) + 0.08(\text{BMI}) + 0.08(\text{Number of comorbidities}) \\ - 0.20(\text{existing respiratory disease}) + 0.46(\text{existing depression or anxiety}) + 0.01(\text{admission duration}) - 0.18(\text{WHO class } 5) \\ - 0.23(\text{WHO class } 6) - 0.09(\text{WHO Class } 7 \text{ to } 9)$$

#### Notes:

- Age should be inputted as years
- Ethnicity:
  - recorded as “Black” if participants selected: Black, African, Caribbean, Black British
  - recorded as “South Asian” if participants selected Indian, Pakistani, Bangladeshi, Other Asian background.
  - recorded Mixed if participants selected White and Black African, White and Asian, White and Black Caribbean, any other Mixed/Multiple ethnic background.
  - recorded as “Other” if participants selected Arab, Chinese, any other ethnic group
- Number of co-morbidities should be inputted as an integer  $\geq 0$ .
- BMI = Body Mass Index.
- Admission duration should be inputted in days.
- World Health Organization (WHO) clinical progression scale:
  - continuous supplemental oxygen only (level 5);
  - Continuous Positive Airway Pressure (CPAP) ventilation, Bi-Level Positive Airway Pressure or High Flow Nasal Oxygen (HFNO) (level 6);
  - Invasive Mechanical Ventilation (IMV), Extra-Corporeal Membrane Oxygenation (ECMO) and acute Renal Replacement Therapy (RRT) (levels 7-9).
- The logistic regression model also included BMI<sup>2</sup> but the regression coefficient rounded to 0.00 so not shown in the equation.

Figure S4 Receiver Operating Characteristic curve for post-COVID breathlessness logistic regression model

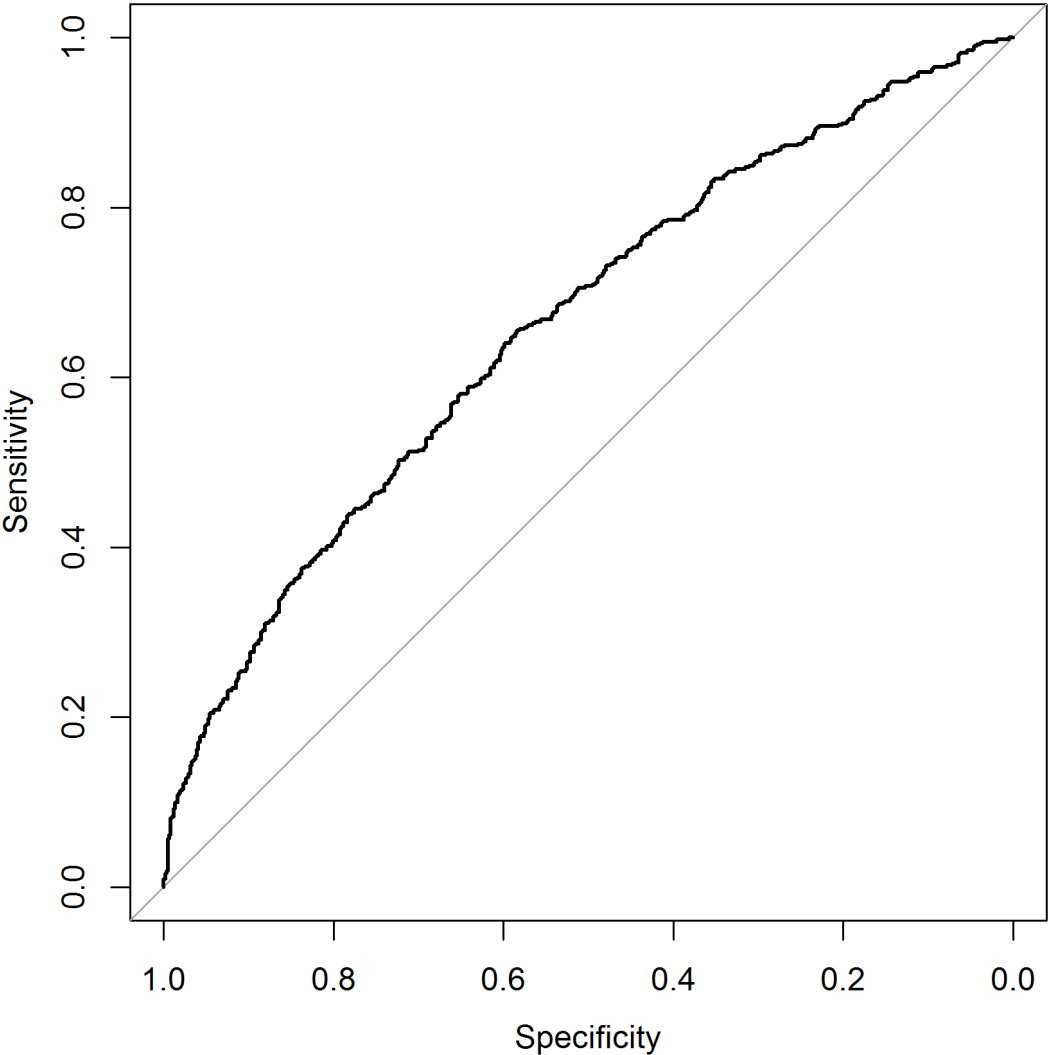

**Figure S5 Calibration plot for post-COVID breathlessness logistic regression model based on the first imputed dataset**

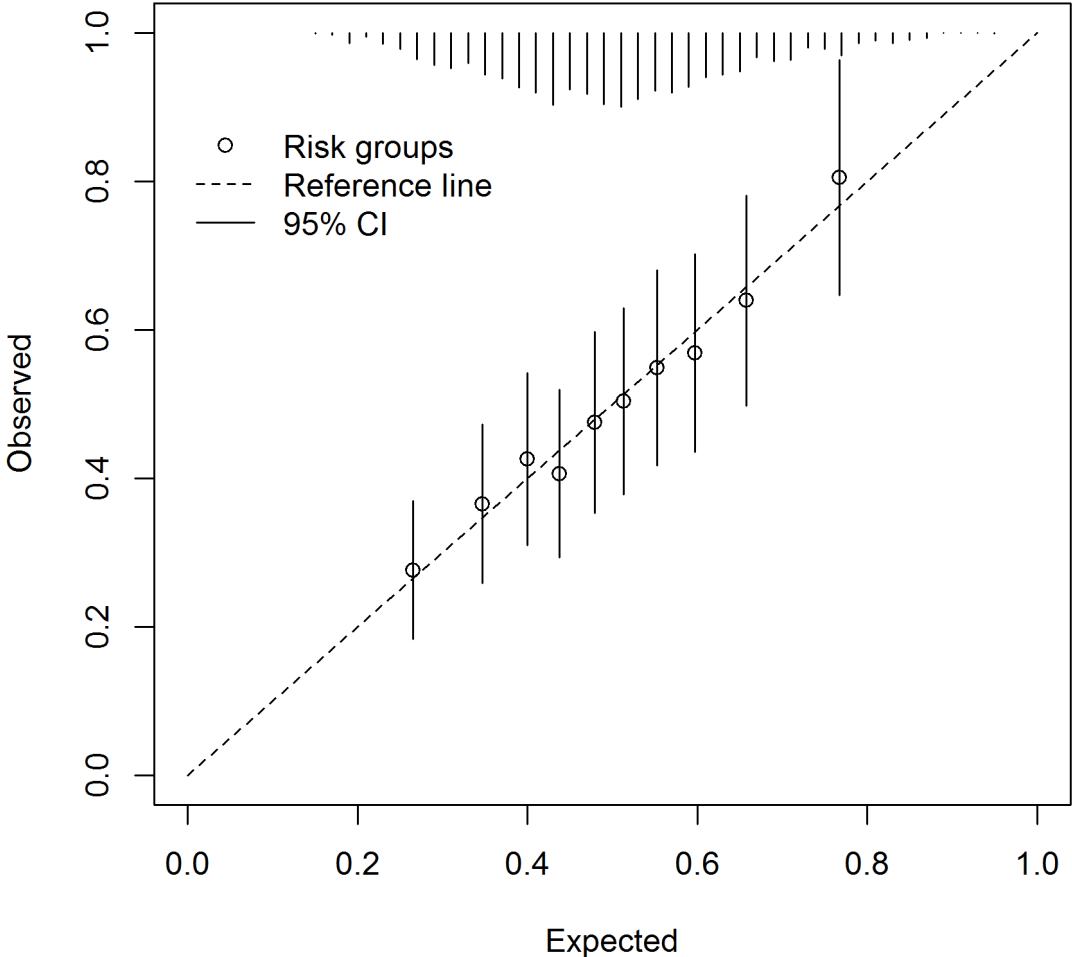

**Subgroup analyses: discharge to review period**

Subgroup analyses were completed based on the period between discharge and review. We grouped participants into three categories. Those who attended the research visit: within three months of discharge; between three and six months of discharge; between six to eight months after discharge. The characteristics of participants within each of the subgroups is displayed in Table S4 - Table S6. The date of discharge for each of the subgroups is displayed in Figure S6

**Table S4: Patient characteristics (stratified by discharge to review period)**

|                          |             | Review period < 3 months  |            |            | Review period 3-6 months  |            |            | Review period 6-8 months  |            |            |
|--------------------------|-------------|---------------------------|------------|------------|---------------------------|------------|------------|---------------------------|------------|------------|
|                          |             | Post-COVID breathlessness |            | Total      | Post-COVID breathlessness |            | Total      | Post-COVID breathlessness |            | Total      |
|                          |             | No (%)                    | Yes (%)    |            | No (%)                    | Yes (%)    |            | No (%)                    | Yes (%)    |            |
| Total N (%)              |             | 103 (47.0)                | 116 (53.0) | 219        | 347 (50.0)                | 347 (50.0) | 694        | 161 (51.4)                | 152 (48.6) | 313        |
| Age at admission (years) | <30         | ≤5 (-)                    | ≤5 (-)     | 7 (3.2)    | ≤5 (-)                    | 6 (1.7)    | 9 (1.3)    | ≤5 (-)                    | ≤5 (-)     | 9 (2.9)    |
|                          | 30-39       | ≤5 (-)                    | 9 (7.8)    | 12 (5.5)   | 15 (4.3)                  | 23 (6.6)   | 38 (5.5)   | 20 (12.4)                 | 9 (5.9)    | 29 (9.3)   |
|                          | 40-49       | 20 (19.4)                 | 15 (12.9)  | 35 (16.0)  | 47 (13.5)                 | 64 (18.4)  | 111 (16.0) | 20 (12.4)                 | 24 (15.8)  | 44 (14.1)  |
|                          | 50-59       | 31 (30.1)                 | 38 (32.8)  | 69 (31.5)  | 92 (26.5)                 | 119 (34.3) | 211 (30.4) | 28 (17.4)                 | 46 (30.3)  | 74 (23.6)  |
|                          | 60-69       | 28 (27.2)                 | 34 (29.3)  | 62 (28.3)  | 101 (29.1)                | 95 (27.4)  | 196 (28.2) | 54 (33.5)                 | 45 (29.6)  | 99 (31.6)  |
|                          | 70-79       | 15 (14.6)                 | 14 (12.1)  | 29 (13.2)  | 67 (19.3)                 | 31 (8.9)   | 98 (14.1)  | 25 (15.5)                 | 16 (10.5)  | 41 (13.1)  |
|                          | 80+         | ≤5 (-)                    | ≤5 (-)     | 5 (2.3)    | 19 (5.5)                  | 6 (1.7)    | 25 (3.6)   | 7 (4.3)                   | ≤5 (-)     | 10 (3.2)   |
|                          | (Missing)   | ≤5 (-)                    | ≤5 (-)     | ≤5 (-)     | ≤5 (-)                    | ≤5 (-)     | 6 (0.9)    | ≤5 (-)                    | ≤5 (-)     | 7 (2.2)    |
| Sex at birth             | Male        | 76 (73.8)                 | 67 (57.8)  | 143 (65.3) | 231 (66.6)                | 191 (55.0) | 422 (60.8) | 109 (67.7)                | 94 (61.8)  | 203 (64.9) |
|                          | Female      | 27 (26.2)                 | 49 (42.2)  | 76 (34.7)  | 116 (33.4)                | 156 (45.0) | 272 (39.2) | 52 (32.3)                 | 58 (38.2)  | 110 (35.1) |
| Ethnicity                | White       | 67 (65.0)                 | 88 (75.9)  | 155 (70.8) | 250 (72.0)                | 260 (74.9) | 510 (73.5) | 105 (65.2)                | 103 (67.8) | 208 (66.5) |
|                          | South Asian | 15 (14.6)                 | 11 (9.5)   | 26 (11.9)  | 43 (12.4)                 | 41 (11.8)  | 84 (12.1)  | 24 (14.9)                 | 19 (12.5)  | 43 (13.7)  |
|                          | Black       | 10 (9.7)                  | 7 (6.0)    | 17 (7.8)   | 23 (6.6)                  | 16 (4.6)   | 39 (5.6)   | 19 (11.8)                 | 17 (11.2)  | 36 (11.5)  |

|                               |                    |                  |                  |                  |                  |                  |                  |                  |                  |                  |
|-------------------------------|--------------------|------------------|------------------|------------------|------------------|------------------|------------------|------------------|------------------|------------------|
|                               | Mixed              | ≤5 (-)           | ≤5 (-)           | 6 (2.7)          | 10 (2.9)         | 7 (2.0)          | 17 (2.4)         | ≤5 (-)           | 8 (5.3)          | 10 (3.2)         |
|                               | Other              | ≤5 (-)           | ≤5 (-)           | 9 (4.1)          | 14 (4.0)         | 16 (4.6)         | 30 (4.3)         | 8 (5.0)          | ≤5 (-)           | 13 (4.2)         |
|                               | (Missing)          | ≤5 (-)           | ≤5 (-)           | 6 (2.7)          | 7 (2.0)          | 7 (2.0)          | 14 (2.0)         | ≤5 (-)           | ≤5 (-)           | ≤5 (-)           |
| Index of multiple deprivation | 1 - most deprived  | 20 (19.4)        | 29 (25.0)        | 49 (22.4)        | 65 (18.7)        | 83 (23.9)        | 148 (21.3)       | 27 (16.8)        | 42 (27.6)        | 69 (22.0)        |
|                               | 2                  | 24 (23.3)        | 27 (23.3)        | 51 (23.3)        | 81 (23.3)        | 70 (20.2)        | 151 (21.8)       | 30 (18.6)        | 34 (22.4)        | 64 (20.4)        |
|                               | 3                  | 22 (21.4)        | 19 (16.4)        | 41 (18.7)        | 59 (17.0)        | 73 (21.0)        | 132 (19.0)       | 35 (21.7)        | 20 (13.2)        | 55 (17.6)        |
|                               | 4                  | 18 (17.5)        | 19 (16.4)        | 37 (16.9)        | 63 (18.2)        | 57 (16.4)        | 120 (17.3)       | 30 (18.6)        | 27 (17.8)        | 57 (18.2)        |
|                               | 5 - least deprived | 18 (17.5)        | 21 (18.1)        | 39 (17.8)        | 75 (21.6)        | 57 (16.4)        | 132 (19.0)       | 34 (21.1)        | 25 (16.4)        | 59 (18.8)        |
|                               | (Missing)          | ≤5 (-)           | ≤5 (-)           | ≤5 (-)           | ≤5 (-)           | 7 (2.0)          | 11 (1.6)         | ≤5 (-)           | ≤5 (-)           | 9 (2.9)          |
| BMI                           | Mean (SD)          | 31.9 (6.5)       | 33.1 (7.4)       | 32.6 (7.0)       | 31.5 (7.3)       | 33.1 (7.5)       | 32.3 (7.4)       | 30.8 (7.1)       | 31.5 (5.7)       | 31.1 (6.5)       |
| Smoking                       | Never              | 60 (58.3)        | 68 (58.6)        | 128 (58.4)       | 188 (54.2)       | 194 (55.9)       | 382 (55.0)       | 102 (63.4)       | 77 (50.7)        | 179 (57.2)       |
|                               | Ex-smoker          | 41 (39.8)        | 47 (40.5)        | 88 (40.2)        | 147 (42.4)       | 141 (40.6)       | 288 (41.5)       | 58 (36.0)        | 72 (47.4)        | 130 (41.5)       |
|                               | Current smoker     | ≤5 (-)           | ≤5 (-)           | ≤5 (-)           | ≤5 (-)           | 8 (2.3)          | 12 (1.7)         | ≤5 (-)           | ≤5 (-)           | ≤5 (-)           |
|                               | (Missing)          | ≤5 (-)           | ≤5 (-)           | ≤5 (-)           | 8 (2.3)          | ≤5 (-)           | 12 (1.7)         | ≤5 (-)           | ≤5 (-)           | ≤5 (-)           |
| Number of comorbidities       | Median (IQR)       | 1.0 (0.0 to 3.0) | 2.0 (1.0 to 4.0) | 2.0 (0.5 to 3.0) | 2.0 (1.0 to 3.0) | 2.0 (1.0 to 3.5) | 2.0 (1.0 to 3.0) | 1.0 (0.0 to 3.0) | 2.0 (0.0 to 4.0) | 2.0 (0.0 to 3.0) |
| Cardiovascular                | No                 | 56 (54.4)        | 65 (56.0)        | 121 (55.3)       | 179 (51.6)       | 195 (56.2)       | 374 (53.9)       | 94 (58.4)        | 90 (59.2)        | 184 (58.8)       |
|                               | Yes                | 47 (45.6)        | 51 (44.0)        | 98 (44.7)        | 168 (48.4)       | 152 (43.8)       | 320 (46.1)       | 67 (41.6)        | 62 (40.8)        | 129 (41.2)       |
| Respiratory                   | No                 | 75 (72.8)        | 75 (64.7)        | 150 (68.5)       | 256 (73.8)       | 265 (76.4)       | 521 (75.1)       | 118 (73.3)       | 104 (68.4)       | 222 (70.9)       |
|                               | Yes                | 28 (27.2)        | 41 (35.3)        | 69 (31.5)        | 91 (26.2)        | 82 (23.6)        | 173 (24.9)       | 43 (26.7)        | 48 (31.6)        | 91 (29.1)        |
| Depression or anxiety         | No                 | 92 (89.3)        | 92 (79.3)        | 184 (84.0)       | 302 (87.0)       | 261 (75.2)       | 563 (81.1)       | 144 (89.4)       | 118 (77.6)       | 262 (83.7)       |
|                               | Yes                | 10 (9.7)         | 22 (19.0)        | 32 (14.6)        | 42 (12.1)        | 79 (22.8)        | 121 (17.4)       | 14 (8.7)         | 31 (20.4)        | 45 (14.4)        |



|                                      | (Missing) | ≤5 (-)    | ≤5 (-)    | ≤5 (-)     | ≤5 (-)     | 7 (2.0)    | 10 (1.4)   | ≤5 (-)     | ≤5 (-)    | 6 (1.9)    |
|--------------------------------------|-----------|-----------|-----------|------------|------------|------------|------------|------------|-----------|------------|
| Breathlessness before COVID-19 (PSQ) | 0         | 57 (55.3) | 78 (67.2) | 135 (61.6) | 216 (62.2) | 232 (66.9) | 448 (64.6) | 101 (62.7) | 97 (63.8) | 198 (63.3) |
|                                      | 1-2       | 19 (18.4) | 26 (22.4) | 45 (20.5)  | 57 (16.4)  | 75 (21.6)  | 132 (19.0) | 27 (16.8)  | 27 (17.8) | 54 (17.3)  |
|                                      | 3 or more | 27 (26.2) | 12 (10.3) | 39 (17.8)  | 74 (21.3)  | 40 (11.5)  | 114 (16.4) | 33 (20.5)  | 28 (18.4) | 61 (19.5)  |

**Table S5: Patient characteristics available during hospital admission (stratified by discharge to review period)**

|                                |                 | Review period < 3 months  |                   |                   | Review period 3-6 months  |                   |                   | Review period 6-8 months  |                    |                   |
|--------------------------------|-----------------|---------------------------|-------------------|-------------------|---------------------------|-------------------|-------------------|---------------------------|--------------------|-------------------|
| 1                              |                 | Post-COVID breathlessness |                   |                   | Post-COVID breathlessness |                   |                   | Post-COVID breathlessness |                    |                   |
|                                |                 | No (%)                    | Yes (%)           | Total             | No (%)                    | Yes (%)           | Total             | No (%)                    | Yes (%)            | Total             |
| Total N (%)                    |                 | 103 (47.0)                | 116 (53.0)        | 219               | 347 (50.0)                | 347 (50.0)        | 694               | 161 (51.4)                | 152 (48.6)         | 313               |
| Admission duration (days)      | Median (IQR)    | 7.0 (4.0 to 15.5)         | 8.5 (4.0 to 16.0) | 8.0 (4.0 to 16.0) | 7.0 (4.0 to 13.0)         | 8.0 (4.0 to 19.5) | 7.0 (4.0 to 16.0) | 8.0 (5.0 to 20.0)         | 10.5 (4.0 to 27.0) | 9.0 (4.0 to 24.0) |
| WHO clinical progression scale | WHO – class 3-4 | 16 (15.5)                 | 13 (11.2)         | 29 (13.2)         | 60 (17.3)                 | 68 (19.6)         | 128 (18.4)        | 34 (21.1)                 | 32 (21.1)          | 66 (21.1)         |
|                                | WHO – class 5   | 49 (47.6)                 | 54 (46.6)         | 103 (47.0)        | 160 (46.1)                | 129 (37.2)        | 289 (41.6)        | 43 (26.7)                 | 42 (27.6)          | 85 (27.2)         |
|                                | WHO – class 6   | 25 (24.3)                 | 28 (24.1)         | 53 (24.2)         | 73 (21.0)                 | 70 (20.2)         | 143 (20.6)        | 38 (23.6)                 | 22 (14.5)          | 60 (19.2)         |
|                                | WHO – class 7-9 | 13 (12.6)                 | 21 (18.1)         | 34 (15.5)         | 54 (15.6)                 | 80 (23.1)         | 134 (19.3)        | 46 (28.6)                 | 56 (36.8)          | 102 (32.6)        |
| Proning                        | No              | 74 (71.8)                 | 80 (69.0)         | 154 (70.3)        | 272 (78.4)                | 244 (70.3)        | 516 (74.4)        | 120 (74.5)                | 102 (67.1)         | 222 (70.9)        |
|                                | Yes             | 16 (15.5)                 | 24 (20.7)         | 40 (18.3)         | 45 (13.0)                 | 65 (18.7)         | 110 (15.9)        | 26 (16.1)                 | 34 (22.4)          | 60 (19.2)         |
|                                | (Missing)       | 13 (12.6)                 | 12 (10.3)         | 25 (11.4)         | 30 (8.6)                  | 38 (11.0)         | 68 (9.8)          | 15 (9.3)                  | 16 (10.5)          | 31 (9.9)          |
| Pulmonary Embolism             | No              | 81 (78.6)                 | 101 (87.1)        | 182 (83.1)        | 304 (87.6)                | 284 (81.8)        | 588 (84.7)        | 133 (82.6)                | 122 (80.3)         | 255 (81.5)        |
|                                | Yes             | 14 (13.6)                 | 8 (6.9)           | 22 (10.0)         | 26 (7.5)                  | 41 (11.8)         | 67 (9.7)          | 16 (9.9)                  | 16 (10.5)          | 32 (10.2)         |
|                                | (Missing)       | 8 (7.8)                   | 7 (6.0)           | 15 (6.8)          | 17 (4.9)                  | 22 (6.3)          | 39 (5.6)          | 12 (7.5)                  | 14 (9.2)           | 26 (8.3)          |
| Coronary thrombosis            | No              | 93 (90.3)                 | 110 (94.8)        | 203 (92.7)        | 330 (95.1)                | 320 (92.2)        | 650 (93.7)        | 147 (91.3)                | 135 (88.8)         | 282 (90.1)        |
|                                | Yes             | ≤5 (-)                    | ≤5 (-)            | ≤5 (-)            | ≤5 (-)                    | ≤5 (-)            | ≤5 (-)            | ≤5 (-)                    | ≤5 (-)             | ≤5 (-)            |

|                                   |           |           |           |            |            |            |            |            |            |            |
|-----------------------------------|-----------|-----------|-----------|------------|------------|------------|------------|------------|------------|------------|
|                                   | (Missing) | 10 (-)    | 6 (-)     | 16 (-)     | 16 (-)     | 26 (-)     | 42 (-)     | 12 (-)     | 16 (-)     | 28 (-)     |
| Antibiotic therapy                | No        | 22 (21.4) | 26 (22.4) | 48 (21.9)  | 66 (19.0)  | 71 (20.5)  | 137 (19.7) | 27 (16.8)  | 24 (15.8)  | 51 (16.3)  |
|                                   | Yes       | 77 (74.8) | 88 (75.9) | 165 (75.3) | 273 (78.7) | 263 (75.8) | 536 (77.2) | 127 (78.9) | 123 (80.9) | 250 (79.9) |
|                                   | (Missing) | ≤5 (-)    | ≤5 (-)    | 6 (2.7)    | 8 (2.3)    | 13 (3.7)   | 21 (3.0)   | 7 (4.3)    | ≤5 (-)     | 12 (3.8)   |
| Systemic steroids (Oral or IV)    | No        | 36 (35.0) | 27 (23.3) | 63 (28.8)  | 170 (49.0) | 165 (47.6) | 335 (48.3) | 113 (70.2) | 102 (67.1) | 215 (68.7) |
|                                   | Yes       | 60 (58.3) | 86 (74.1) | 146 (66.7) | 158 (45.5) | 160 (46.1) | 318 (45.8) | 32 (19.9)  | 35 (23.0)  | 67 (21.4)  |
|                                   | (Missing) | 7 (6.8)   | ≤5 (-)    | 10 (4.6)   | 19 (5.5)   | 22 (6.3)   | 41 (5.9)   | 16 (9.9)   | 15 (9.9)   | 31 (9.9)   |
| Therapeutic dose anti-coagulation | No        | 46 (44.7) | 67 (57.8) | 113 (51.6) | 207 (59.7) | 180 (51.9) | 387 (55.8) | 99 (61.5)  | 86 (56.6)  | 185 (59.1) |
|                                   | Yes       | 50 (48.5) | 43 (37.1) | 93 (42.5)  | 123 (35.4) | 148 (42.7) | 271 (39.0) | 47 (29.2)  | 54 (35.5)  | 101 (32.3) |
|                                   | (Missing) | 7 (6.8)   | 6 (5.2)   | 13 (5.9)   | 17 (4.9)   | 19 (5.5)   | 36 (5.2)   | 15 (9.3)   | 12 (7.9)   | 27 (8.6)   |
| SARS-CoV-2 swab                   | Negative  | 13 (12.6) | 8 (6.9)   | 21 (9.6)   | 22 (6.3)   | 31 (8.9)   | 53 (7.6)   | 12 (7.5)   | 12 (7.9)   | 24 (7.7)   |
|                                   | Positive  | 81 (78.6) | 89 (76.7) | 170 (77.6) | 302 (87.0) | 298 (85.9) | 600 (86.5) | 139 (86.3) | 130 (85.5) | 269 (85.9) |
|                                   | (Missing) | 9 (8.8)   | 19 (16.4) | 28 (12.8)  | 23 (6.7)   | 18 (5.2)   | 41 (5.9)   | 10 (6.2)   | 10 (6.6)   | 20 (6.4)   |

**Table S6: Patient characteristics available at the research visit (stratified by discharge to review period)**

|                                        |              | Review period < 3 months  |                     |                     | Review period 3-6 months  |                     |                     | Review period 6-8 months  |                     |                     |
|----------------------------------------|--------------|---------------------------|---------------------|---------------------|---------------------------|---------------------|---------------------|---------------------------|---------------------|---------------------|
|                                        |              | Post-COVID breathlessness |                     |                     | Post-COVID breathlessness |                     |                     | Post-COVID breathlessness |                     |                     |
|                                        |              | No (%)                    | Yes (%)             | Total               | No (%)                    | Yes (%)             | Total               | No (%)                    | Yes (%)             | Total               |
| Total N (%)                            |              | 103 (47.0)                | 116 (53.0)          | 219                 | 347 (50.0)                | 347 (50.0)          | 694                 | 161 (51.4)                | 152 (48.6)          | 313                 |
| Discharge to review period (months)    | Median (IQR) | 2.4 (2.0 to 2.8)          | 2.4 (2.1 to 2.8)    | 2.4 (2.0 to 2.8)    | 4.4 (3.7 to 5.2)          | 4.5 (3.8 to 5.3)    | 4.5 (3.7 to 5.3)    | 6.6 (6.3 to 7.0)          | 6.7 (6.3 to 7.3)    | 6.7 (6.3 to 7.2)    |
| Breathlessness at research visit (PSQ) | 0            | 73 (70.9)                 | ≤5 (-)              | 73 (33.3)           | 265 (76.4)                | ≤5 (-)              | 265 (38.2)          | 124 (77.0)                | ≤5 (-)              | 124 (39.6)          |
|                                        | 1-2          | 12 (11.7)                 | 28 (24.1)           | 40 (18.3)           | 39 (11.2)                 | 86 (24.8)           | 125 (18.0)          | 19 (11.8)                 | 29 (19.1)           | 48 (15.3)           |
|                                        | 3 or more    | 18 (17.5)                 | 88 (75.9)           | 106 (48.4)          | 43 (12.4)                 | 261 (75.2)          | 304 (43.8)          | 18 (11.2)                 | 123 (80.9)          | 141 (45.0)          |
| PHQ9 total score                       | Median (IQR) | 3.0 (0.0 to 9.0)          | 7.0 (3.0 to 13.0)   | 5.0 (2.0 to 11.0)   | 3.0 (1.0 to 8.0)          | 8.0 (3.0 to 13.0)   | 5.0 (2.0 to 11.0)   | 3.0 (1.0 to 7.0)          | 8.0 (3.0 to 15.0)   | 5.0 (1.0 to 10.0)   |
| GAD7 total score                       | Median (IQR) | 3.0 (0.0 to 7.0)          | 5.0 (0.0 to 10.0)   | 4.0 (0.0 to 9.0)    | 2.0 (0.0 to 7.0)          | 5.0 (1.0 to 10.0)   | 3.0 (0.0 to 8.0)    | 2.0 (0.0 to 5.0)          | 6.0 (2.0 to 12.2)   | 3.0 (0.0 to 9.0)    |
| PCL-5 Total Severity Score             | Median (IQR) | 6.0 (1.0 to 17.0)         | 14.0 (5.0 to 32.0)  | 9.0 (2.5 to 26.0)   | 6.0 (2.0 to 15.0)         | 14.0 (5.0 to 30.0)  | 9.0 (3.0 to 23.0)   | 7.0 (2.0 to 15.0)         | 16.0 (7.0 to 39.8)  | 10.0 (4.0 to 23.0)  |
| CRP                                    | Median (IQR) | 4.0 (2.0 to 5.0)          | 5.0 (3.4 to 6.0)    | 4.0 (3.0 to 5.2)    | 4.0 (1.5 to 5.0)          | 4.0 (2.0 to 5.4)    | 4.0 (2.0 to 5.0)    | 3.0 (1.0 to 5.0)          | 3.0 (1.0 to 5.0)    | 3.0 (1.0 to 5.0)    |
| BNP/NT-Pro-BNP ng/L >threshold         | No           | 46 (44.7)                 | 60 (51.7)           | 106 (48.4)          | 168 (48.4)                | 167 (48.1)          | 335 (48.3)          | 79 (49.1)                 | 77 (50.7)           | 156 (49.8)          |
|                                        | Yes          | ≤5 (-)                    | ≤5 (-)              | ≤5 (-)              | 17 (4.9)                  | 8 (2.3)             | 25 (3.6)            | 10 (6.2)                  | ≤5 (-)              | ≤5 (-)              |
|                                        | (Missing)    | 55 (53.4)                 | 53 (45.7)           | 108 (49.3)          | 162 (46.7)                | 172 (49.6)          | 334 (48.1)          | 72 (44.7)                 | 70 (46.1)           | 142 (45.4)          |
| Haemoglobin level All (g/dl)           | Median (IQR) | 14.6 (13.6 to 15.4)       | 14.1 (13.1 to 14.8) | 14.4 (13.2 to 15.2) | 14.3 (13.2 to 15.2)       | 13.9 (13.0 to 15.0) | 14.1 (13.2 to 15.2) | 14.3 (13.3 to 15.0)       | 14.1 (13.2 to 15.0) | 14.2 (13.2 to 15.0) |

|                                  |              |                        |                        |                        |                        |                        |                        |                        |                        |                        |
|----------------------------------|--------------|------------------------|------------------------|------------------------|------------------------|------------------------|------------------------|------------------------|------------------------|------------------------|
| Haemoglobin level male (g/dL)    | Median (IQR) | 14.8 (14.1 to 15.6)    | 14.6 (13.6 to 15.4)    | 14.8 (13.8 to 15.5)    | 14.7 (13.9 to 15.6)    | 14.6 (13.7 to 15.6)    | 14.7 (13.8 to 15.6)    | 14.7 (13.8 to 15.4)    | 14.6 (13.7 to 15.5)    | 14.6 (13.8 to 15.5)    |
| Haemoglobin level female (g/dL)  | Median (IQR) | 13.6 (13.1 to 14.4)    | 13.2 (12.8 to 14.1)    | 13.4 (13.0 to 14.2)    | 13.5 (12.8 to 14.4)    | 13.4 (12.6 to 13.9)    | 13.4 (12.6 to 14.1)    | 13.3 (12.1 to 13.9)    | 13.4 (12.2 to 14.0)    | 13.3 (12.1 to 14.0)    |
| ISWT distance (m)                | Median (IQR) | 390.0 (270.0 to 550.0) | 345.0 (222.5 to 540.0) | 360.0 (245.0 to 550.0) | 440.0 (267.5 to 622.5) | 350.0 (222.5 to 550.0) | 380.0 (250.0 to 569.5) | 454.0 (322.5 to 622.5) | 350.0 (260.0 to 532.2) | 415.0 (270.0 to 600.0) |
| ISWT % predicted                 | Median (IQR) | 54.8 (30.2 to 71.4)    | 53.5 (32.3 to 69.2)    | 54.0 (32.3 to 69.3)    | 61.7 (43.1 to 81.9)    | 50.4 (34.6 to 69.5)    | 56.4 (38.2 to 75.8)    | 62.8 (46.4 to 89.8)    | 53.8 (37.8 to 73.4)    | 58.7 (39.2 to 77.7)    |
| Oxygen saturations post ISWT (%) | Median (IQR) | 96.0 (94.0 to 98.0)    | 96.0 (94.0 to 97.0)    | 96.0 (94.0 to 97.0)    | 96.0 (94.0 to 97.0)    | 96.0 (93.0 to 97.0)    | 96.0 (93.0 to 97.0)    | 97.0 (94.0 to 99.0)    | 96.0 (94.0 to 98.0)    | 97.0 (94.0 to 98.2)    |
| Borg leg fatigue score post ISWT | Median (IQR) | 2.0 (0.5 to 3.0)       | 3.0 (0.5 to 3.0)       | 2.0 (0.5 to 3.0)       | 2.0 (0.5 to 4.0)       | 3.0 (2.0 to 4.0)       | 3.0 (1.0 to 4.0)       | 2.0 (0.5 to 3.0)       | 3.0 (2.0 to 5.0)       | 3.0 (1.0 to 4.0)       |
| FEV1 (L)                         | Median (IQR) | 2.7 (2.4 to 3.2)       | 2.6 (2.1 to 3.1)       | 2.6 (2.2 to 3.2)       | 2.8 (2.3 to 3.3)       | 2.7 (2.2 to 3.3)       | 2.8 (2.2 to 3.3)       | 2.9 (2.2 to 3.4)       | 2.6 (2.1 to 3.3)       | 2.7 (2.1 to 3.4)       |
| FEV1 % predicted                 | Median (IQR) | 94.2 (86.4 to 107.1)   | 87.2 (79.5 to 97.1)    | 89.9 (81.2 to 101.6)   | 93.9 (82.9 to 105.2)   | 90.9 (77.9 to 101.6)   | 92.1 (79.6 to 103.4)   | 93.5 (82.8 to 105.5)   | 90.0 (77.7 to 101.8)   | 92.0 (79.2 to 104.3)   |
| FEV1 < LLN                       | No           | 32 (84.2)              | 50 (80.6)              | 82 (82.0)              | 158 (87.8)             | 155 (77.9)             | 313 (82.6)             | 84 (81.6)              | 79 (78.2)              | 163 (79.9)             |
|                                  | Yes          | 6 (15.8)               | 12 (19.4)              | 18 (18.0)              | 22 (12.2)              | 44 (22.1)              | 66 (17.4)              | 19 (18.4)              | 22 (21.8)              | 41 (20.1)              |
| FVC                              | Median (IQR) | 3.5 (2.9 to 4.3)       | 3.1 (2.5 to 3.9)       | 3.4 (2.7 to 4.1)       | 3.6 (3.0 to 4.3)       | 3.4 (2.7 to 4.1)       | 3.5 (2.8 to 4.2)       | 3.5 (2.8 to 4.4)       | 3.2 (2.5 to 4.1)       | 3.4 (2.6 to 4.3)       |
| FVC % predicted                  | Median (IQR) | 92.1 (83.7 to 104.9)   | 84.1 (75.8 to 96.4)    | 87.4 (79.5 to 99.7)    | 95.3 (83.5 to 105.1)   | 88.2 (75.7 to 99.6)    | 91.3 (79.4 to 102.6)   | 91.9 (78.3 to 106.2)   | 84.4 (72.5 to 98.5)    | 88.8 (75.1 to 102.7)   |
| FVC < LLN                        | No           | 34 (89.5)              | 45 (72.6)              | 79 (79.0)              | 158 (87.8)             | 145 (72.9)             | 303 (79.9)             | 84 (82.4)              | 70 (70.0)              | 154 (76.2)             |
|                                  | Yes          | ≤5 (-)                 | 17 (27.4)              | 21 (21.0)              | 22 (12.2)              | 54 (27.1)              | 76 (20.1)              | 18 (17.6)              | 30 (30.0)              | 48 (23.8)              |

|                               |              |                       |                      |                       |                       |                      |                       |                      |                       |                       |
|-------------------------------|--------------|-----------------------|----------------------|-----------------------|-----------------------|----------------------|-----------------------|----------------------|-----------------------|-----------------------|
| FEV1/FVC ratio expressed as % | Median (IQR) | 79.7 (75.1 to 85.5)   | 82.4 (78.0 to 85.4)  | 81.0 (76.7 to 85.6)   | 77.8 (72.6 to 82.6)   | 80.8 (77.1 to 85.5)  | 79.5 (75.3 to 84.4)   | 81.8 (76.2 to 85.6)  | 83.6 (78.7 to 89.1)   | 82.5 (77.3 to 87.8)   |
| FEV1/FVC < LLN                | No           | 34 (91.9)             | 61 (98.4)            | 95 (96.0)             | 165 (92.2)            | 190 (96.4)           | 355 (94.4)            | 96 (95.0)            | 91 (93.8)             | 187 (94.4)            |
|                               | Yes          | ≤5 (-)                | ≤5 (-)               | ≤5 (-)                | 14 (7.8)              | 7 (3.6)              | 21 (5.6)              | ≤5 (-)               | 6 (6.2)               | 11 (5.6)              |
| TLCO                          | Median (IQR) | 7.7 (6.7 to 8.4)      | 6.4 (5.2 to 8.1)     | 7.0 (6.0 to 8.2)      | 7.8 (6.8 to 9.3)      | 6.9 (5.7 to 8.2)     | 7.4 (6.1 to 8.7)      | 7.0 (5.7 to 7.7)     | 6.7 (6.2 to 8.6)      | 6.9 (5.9 to 8.3)      |
| TLCO % predicted              | Median (IQR) | 93.8 (83.0 to 101.5)  | 90.6 (68.1 to 101.7) | 90.7 (74.6 to 101.9)  | 94.6 (80.8 to 103.9)  | 87.5 (73.1 to 104.1) | 91.4 (75.4 to 104.0)  | 86.8 (77.5 to 94.9)  | 93.6 (86.2 to 106.1)  | 89.7 (78.4 to 99.1)   |
| TLCO predicted <80%           | No           | 16 (76.2)             | 20 (64.5)            | 36 (69.2)             | 48 (76.2)             | 45 (63.4)            | 93 (69.4)             | 22 (62.9)            | 25 (80.6)             | 47 (71.2)             |
|                               | Yes          | ≤5 (-)                | 11 (35.5)            | 16 (30.8)             | 15 (23.8)             | 26 (36.6)            | 41 (30.6)             | 13 (37.1)            | 6 (19.4)              | 19 (28.8)             |
| KCO                           | Median (IQR) | 1.5 (1.5 to 1.7)      | 1.5 (1.2 to 1.6)     | 1.5 (1.2 to 1.7)      | 1.5 (1.3 to 1.6)      | 1.5 (1.3 to 1.6)     | 1.5 (1.3 to 1.6)      | 1.4 (1.2 to 1.5)     | 1.5 (1.3 to 1.7)      | 1.4 (1.2 to 1.6)      |
| KCO % predicted               | Median (IQR) | 105.4 (97.2 to 108.8) | 97.9 (85.6 to 111.3) | 102.5 (92.9 to 111.1) | 104.9 (92.7 to 112.2) | 99.6 (86.6 to 111.3) | 102.3 (89.2 to 112.2) | 99.8 (90.7 to 105.5) | 100.3 (87.5 to 115.8) | 100.3 (87.5 to 108.1) |
| KCO predicted <80%            | No           | 20 (95.2)             | 28 (84.8)            | 48 (88.9)             | 59 (92.2)             | 67 (93.1)            | 126 (92.6)            | 33 (91.7)            | 32 (97.0)             | 65 (94.2)             |
|                               | Yes          | ≤5 (-)                | ≤5 (-)               | 6 (11.1)              | ≤5 (-)                | ≤5 (-)               | 10 (7.4)              | ≤5 (-)               | ≤5 (-)                | ≤5 (-)                |

**Figure S6: Discharge date of study participants stratified by the period between discharge and research visit**

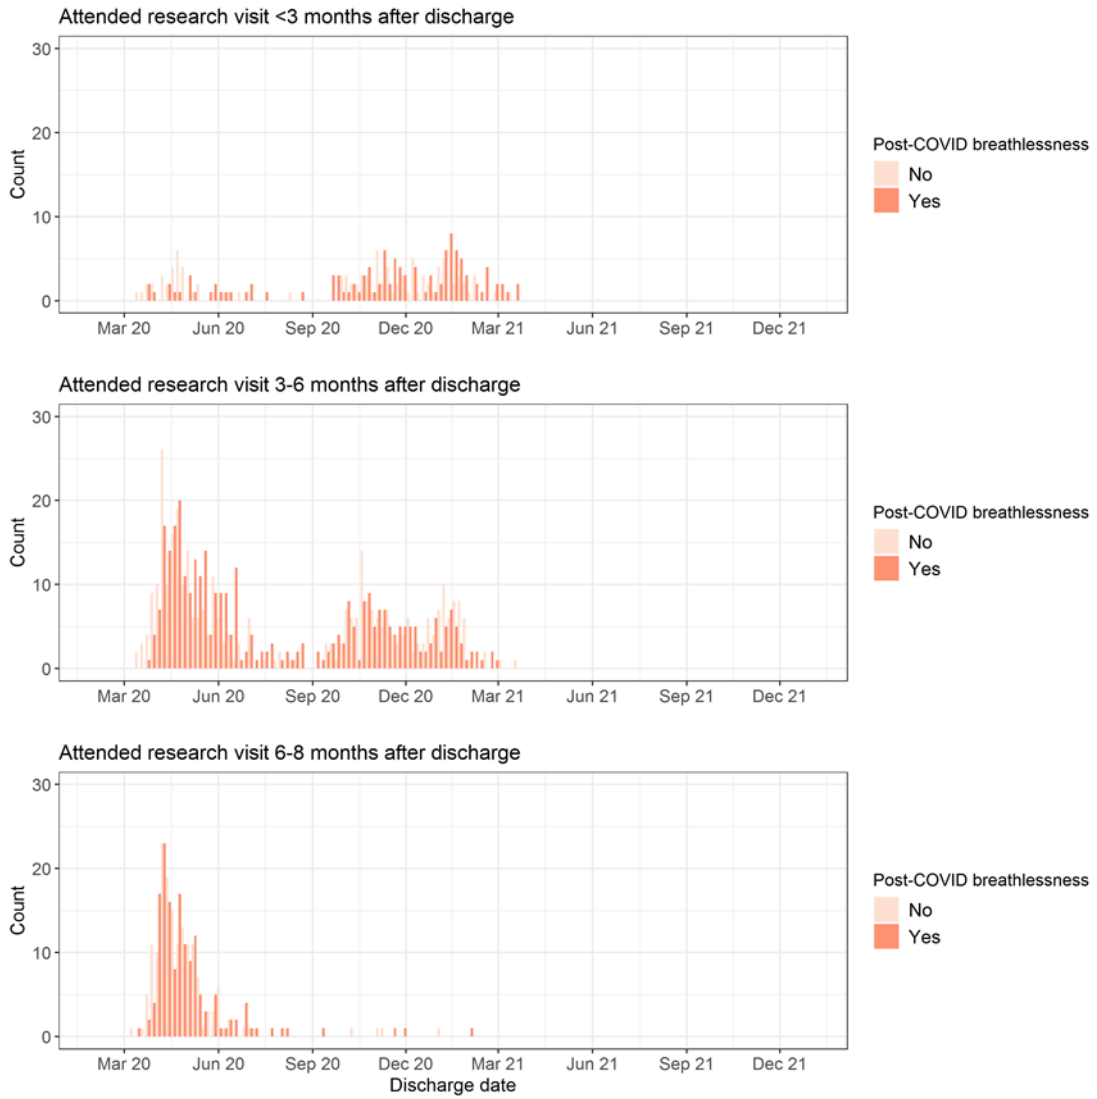

### Sensitivity analyses: PSQ breathlessness at the research visit as a linear outcome

We ran a linear regression model using a complete case analysis for PSQ breathlessness score at the research visit modelled as a linear outcome (0-10). Consistent with results from the primary outcome, the most deprived quintiles, female sex and admission duration were associated with PSQ breathlessness at the research visit, though not pre-existing anxiety/depression. Participants aged 60 years or older, but not individuals of Black ethnicity were less likely to report breathlessness than the reference group. The number of co-morbidities and PSQ breathlessness before admission were also associated with breathlessness at the research visit when modelled as a linear outcome.

**Table S7 Linear regression model using breathlessness at research visit (PSQ) as the dependent variable**

| Dependent: Breathlessness             |                    | value     | Coefficient (univariable)       | Coefficient (multivariable)     |
|---------------------------------------|--------------------|-----------|---------------------------------|---------------------------------|
| Sex at birth                          | Male               | 2.4 (2.8) | -                               | -                               |
|                                       | Female             | 3.2 (3.0) | 0.81 (0.47 to 1.14, p<0.001)    | 0.52 (0.17 to 0.86, p=0.003)    |
| Age at admission (years)              | 50-59              | 3.1 (3.0) | -                               | -                               |
|                                       | <30                | 2.6 (2.9) | -0.52 (-1.69 to 0.65, p=0.384)  | -0.37 (-1.52 to 0.79, p=0.534)  |
|                                       | 30-39              | 2.2 (2.6) | -0.78 (-1.49 to -0.08, p=0.030) | -0.59 (-1.29 to 0.10, p=0.095)  |
|                                       | 40-49              | 2.6 (2.8) | -0.61 (-1.12 to -0.10, p=0.019) | -0.35 (-0.86 to 0.16, p=0.178)  |
|                                       | 60-69              | 2.8 (2.9) | -0.31 (-0.73 to 0.12, p=0.157)  | -0.73 (-1.16 to -0.29, p=0.001) |
|                                       | 70-79              | 2.3 (2.7) | -0.83 (-1.36 to -0.30, p=0.002) | -1.23 (-1.79 to -0.68, p<0.001) |
|                                       | 80+                | 2.3 (3.0) | -0.61 (-1.56 to 0.33, p=0.205)  | -1.10 (-2.07 to -0.13, p=0.027) |
| Index of Multiple Deprivation         | 5 - least deprived | 2.2 (2.5) | -                               | -                               |
|                                       | 4                  | 2.3 (2.7) | 0.15 (-0.39 to 0.68, p=0.588)   | 0.40 (-0.13 to 0.93, p=0.142)   |
|                                       | 3                  | 2.8 (2.9) | 0.52 (-0.01 to 1.04, p=0.055)   | 0.52 (-0.00 to 1.04, p=0.051)   |
|                                       | 2                  | 2.8 (2.9) | 0.68 (0.18 to 1.19, p=0.008)    | 0.66 (0.15 to 1.17, p=0.011)    |
|                                       | 1 - most deprived  | 3.3 (3.1) | 1.20 (0.69 to 1.71, p<0.001)    | 1.15 (0.63 to 1.67, p<0.001)    |
| Ethnicity                             | White              | 2.8 (2.9) | -                               | -                               |
|                                       | South Asian        | 2.5 (2.9) | -0.40 (-0.90 to 0.09, p=0.111)  | -0.01 (-0.55 to 0.53, p=0.962)  |
|                                       | Black              | 2.5 (3.2) | -0.34 (-0.96 to 0.28, p=0.287)  | -0.44 (-1.07 to 0.19, p=0.172)  |
|                                       | Mixed              | 2.4 (2.9) | -0.15 (-1.16 to 0.85, p=0.763)  | -0.13 (-1.14 to 0.88, p=0.804)  |
|                                       | Other              | 2.5 (2.7) | -0.44 (-1.25 to 0.37, p=0.288)  | -0.29 (-1.12 to 0.54, p=0.498)  |
| BMI                                   | [16.5,77.8]        | 2.7 (2.9) | 0.06 (0.04 to 0.08, p<0.001)    | 0.11 (-0.02 to 0.24, p=0.091)   |
| Number of comorbidities               | [0.0,17.0]         | 2.7 (2.9) | 0.33 (0.25 to 0.40, p<0.001)    | 0.13 (0.02 to 0.23, p=0.017)    |
| Pre-existing depression or anxiety    | No                 | 2.5 (2.8) | -                               | -                               |
|                                       | Yes                | 3.9 (2.9) | 1.51 (1.07 to 1.94, p<0.001)    | 0.52 (-0.01 to 1.05, p=0.055)   |
| Pre-existing respiratory condition    | No                 | 2.4 (2.8) | -                               | -                               |
|                                       | Yes                | 3.6 (3.0) | 1.13 (0.77 to 1.49, p<0.001)    | 0.22 (-0.19 to 0.63, p=0.293)   |
| Smoking                               | Never              | 2.5 (2.8) | -                               | -                               |
|                                       | Ex-smoker          | 3.0 (3.0) | 0.54 (0.21 to 0.87, p=0.001)    | 0.28 (-0.06 to 0.62, p=0.111)   |
|                                       | Current smoker     | 3.5 (3.0) | 0.96 (-0.39 to 2.32, p=0.162)   | 0.09 (-1.32 to 1.50, p=0.902)   |
| Breathlessness before admission (PSQ) | [0.0,10.0]         | 2.7 (2.9) | 0.47 (0.39 to 0.54, p<0.001)    | 0.40 (0.31 to 0.50, p<0.001)    |
| Admission duration (days)             | [0.0,171.0]        | 2.7 (2.9) | 0.02 (0.01 to 0.02, p<0.001)    | 0.01 (0.00 to 0.03, p=0.006)    |
| WHO clinical progression scale        | WHO – class 3-4    | 2.8 (2.9) | -                               | -                               |
|                                       | WHO – class 5      | 2.5 (2.8) | -0.17 (-0.63 to 0.29, p=0.473)  | -0.17 (-0.65 to 0.30, p=0.477)  |
|                                       | WHO – class 6      | 2.6 (2.8) | -0.19 (-0.71 to 0.33, p=0.479)  | -0.33 (-0.88 to 0.21, p=0.229)  |
|                                       | WHO – class 7-9    | 3.1 (3.0) | 0.29 (-0.23 to 0.80, p=0.277)   | 0.20 (-0.45 to 0.85, p=0.549)   |

BMI = Body Mass Index. IV = Intravenous. World Health Organization (WHO) clinical progression scale: not requiring continuous supplemental oxygen (levels 3-4); continuous supplemental oxygen only (level 5); Continuous Positive Airway Pressure (CPAP) ventilation, Bi-Level Positive Airway Pressure or High Flow Nasal Oxygen (HFNO) (level 6); Invasive Mechanical Ventilation (IMV), Extra-Corporeal Membrane Oxygenation (ECMO) and acute Renal Replacement Therapy (RRT) (levels 7-9).



### Sensitivity analyses: PSQ breathlessness at the research visit as a binary outcome

As a second sensitivity analysis, the PSQ breathlessness score reported at the research visit was categorised into a binary variable (taking a PSQ of less than 3 as “not breathless” and a PSQ of greater or equal to 3 as a “breathless”) and used as the outcome variable for a multivariable logistic regression using a complete case analysis. For consistency, we used the same explanatory variables as selected for the primary outcome, though we accounted for other characteristics likely to influence breathlessness, smoking status, and breathlessness prior to COVID-19 recorded by the PSQ. Patient characteristics stratified by PSQ breathlessness at the research visit are available in Table S8-Table S10. Results of the Multivariable logistic regression with breathlessness at the research visit as the dependent variable are displayed in Table S11.

**Table S8 Patient characteristics stratified by breathlessness at the research visit (PSQ)**

|                                       | Total N      | Levels             | Not breathless   | Breathless       | Total            |
|---------------------------------------|--------------|--------------------|------------------|------------------|------------------|
| Total N (%)                           |              |                    | 675 (55.1)       | 551 (44.9)       | 1226             |
| Age at admission (years)              | 1213 (98.9)  | <30                | 15 (2.2)         | 10 (1.8)         | 25 (2.0)         |
|                                       |              | 30-39              | 47 (7.0)         | 32 (5.8)         | 79 (6.4)         |
|                                       |              | 40-49              | 115 (17.0)       | 75 (13.6)        | 190 (15.5)       |
|                                       |              | 50-59              | 176 (26.1)       | 178 (32.3)       | 354 (28.9)       |
|                                       |              | 60-69              | 191 (28.3)       | 166 (30.1)       | 357 (29.1)       |
|                                       |              | 70-79              | 102 (15.1)       | 66 (12.0)        | 168 (13.7)       |
|                                       |              | 80+                | 22 (3.3)         | 18 (3.3)         | 40 (3.3)         |
|                                       |              | (Missing)          | 7 (1.0)          | 6 (1.1)          | 13 (1.1)         |
| Sex at birth                          | 1226 (100.0) | Male               | 459 (68.0)       | 309 (56.1)       | 768 (62.6)       |
|                                       |              | Female             | 216 (32.0)       | 242 (43.9)       | 458 (37.4)       |
| Ethnicity                             | 1203 (98.1)  | White              | 456 (67.6)       | 417 (75.7)       | 873 (71.2)       |
|                                       |              | South Asian        | 95 (14.1)        | 58 (10.5)        | 153 (12.5)       |
|                                       |              | Black              | 58 (8.6)         | 34 (6.2)         | 92 (7.5)         |
|                                       |              | Mixed              | 19 (2.8)         | 14 (2.5)         | 33 (2.7)         |
|                                       |              | Other              | 34 (5.0)         | 18 (3.3)         | 52 (4.2)         |
|                                       |              | (Missing)          | 13 (1.9)         | 10 (1.8)         | 23 (1.9)         |
| Index of multiple deprivation         | 1204 (98.2)  | 1 - most deprived  | 125 (18.5)       | 141 (25.6)       | 266 (21.7)       |
|                                       |              | 2                  | 141 (20.9)       | 125 (22.7)       | 266 (21.7)       |
|                                       |              | 3                  | 128 (19.0)       | 100 (18.1)       | 228 (18.6)       |
|                                       |              | 4                  | 131 (19.4)       | 83 (15.1)        | 214 (17.5)       |
|                                       |              | 5 - least deprived | 141 (20.9)       | 89 (16.2)        | 230 (18.8)       |
|                                       |              | (Missing)          | 9 (1.3)          | 13 (2.4)         | 22 (1.8)         |
| BMI                                   | 1090 (88.9)  | Mean (SD)          | 30.9 (6.6)       | 33.3 (7.5)       | 32.0 (7.1)       |
| Smoking                               | 1213 (98.9)  | Never              | 407 (60.3)       | 282 (51.2)       | 689 (56.2)       |
|                                       |              | Ex-smoker          | 253 (37.5)       | 253 (45.9)       | 506 (41.3)       |
|                                       |              | Current smoker     | 8 (1.2)          | 10 (1.8)         | 18 (1.5)         |
| Number of comorbidities               | 1226 (100.0) | Median (IQR)       | 1.0 (0.0 to 3.0) | 2.0 (1.0 to 4.0) | 2.0 (0.0 to 3.0) |
| Pre-existing cardiovascular condition | 1226 (100.0) | No                 | 391 (57.9)       | 288 (52.3)       | 679 (55.4)       |
|                                       |              | Yes                | 284 (42.1)       | 263 (47.7)       | 547 (44.6)       |
| Pre-existing respiratory condition    | 1226 (100.0) | No                 | 534 (79.1)       | 359 (65.2)       | 893 (72.8)       |
|                                       |              | Yes                | 141 (20.9)       | 192 (34.8)       | 333 (27.2)       |
| Depression or anxiety                 | 1207 (98.5)  | No                 | 598 (88.6)       | 411 (74.6)       | 1009 (82.3)      |
|                                       |              | Yes                | 67 (9.9)         | 131 (23.8)       | 198 (16.2)       |

Breathlessness at the research visit was taken as a PSQ <3 as “not breathless” and a PSQ of ≥ 3 as “breathless”. BMI = Body Mass Index.

**Table S9 Patient characteristics available during hospital admission, stratified by breathlessness at the research visit (PSQ)**

|                                     | Total N      | Levels          | Not breathless    | Breathless        | Total             |
|-------------------------------------|--------------|-----------------|-------------------|-------------------|-------------------|
| Total N (%)                         |              |                 | 675 (55.1)        | 551 (44.9)        | 1226              |
| Admission duration (days)           | 1225 (99.9)  | Median (IQR)    | 7.0 (4.0 to 14.0) | 9.0 (4.0 to 21.0) | 8.0 (4.0 to 17.0) |
| WHO clinical progression scale      | 1226 (100.0) | WHO – class 3-4 | 126 (18.7)        | 97 (17.6)         | 223 (18.2)        |
|                                     |              | WHO – class 5   | 271 (40.1)        | 206 (37.4)        | 477 (38.9)        |
|                                     |              | WHO – class 6   | 144 (21.3)        | 112 (20.3)        | 256 (20.9)        |
|                                     |              | WHO – class 7-9 | 134 (19.9)        | 136 (24.7)        | 270 (22.0)        |
| Prone during mechanical ventilation | 1102 (89.9)  | No              | 508 (75.3)        | 384 (69.7)        | 892 (72.8)        |
|                                     |              | Yes             | 104 (15.4)        | 106 (19.2)        | 210 (17.1)        |
|                                     |              | (Missing)       | 63 (9.3)          | 61 (11.1)         | 124 (10.1)        |
| Pulmonary Embolism                  | 1146 (93.5)  | No              | 569 (84.3)        | 456 (82.8)        | 1025 (83.6)       |
|                                     |              | Yes             | 63 (9.3)          | 58 (10.5)         | 121 (9.9)         |
|                                     |              | (Missing)       | 43 (6.4)          | 37 (6.7)          | 80 (6.5)          |
| Coronary thrombosis                 | 1140 (93.0)  | No              | 629 (93.2)        | 506 (91.8)        | 1135 (92.6)       |
|                                     |              | Yes             | <5 (-)            | <5 (-)            | 5 (0.4)           |
|                                     |              | (Missing)       | - (-)             | - (-)             | 86 (7.0)          |
| Antibiotic therapy                  | 1187 (96.8)  | No              | 135 (20.0)        | 101 (18.3)        | 236 (19.2)        |
|                                     |              | Yes             | 518 (76.7)        | 433 (78.6)        | 951 (77.6)        |
|                                     |              | (Missing)       | 22 (3.3)          | 17 (3.1)          | 39 (3.2)          |
| Systemic steroids (Oral or IV)      | 1144 (93.3)  | No              | 353 (52.3)        | 260 (47.2)        | 613 (50.0)        |
|                                     |              | Yes             | 278 (41.2)        | 253 (45.9)        | 531 (43.3)        |
|                                     |              | (Missing)       | 44 (6.5)          | 38 (6.9)          | 82 (6.7)          |
| Therapeutic dose anti-coagulation   | 1010 (93.8)  | No              | 349 (58.1)        | 276 (58.0)        | 625 (58.0)        |
|                                     |              | Yes             | 216 (35.9)        | 169 (35.5)        | 385 (35.7)        |
|                                     |              | (Missing)       | 36 (6.0)          | 31 (6.5)          | 67 (6.2)          |

Breathlessness at the research visit was taken as a PSQ <3 as “not breathless” and a PSQ of ≥ 3 as “breathless”. IV = Intravenous. World Health Organization (WHO) clinical progression scale: not requiring continuous supplemental oxygen (levels 3-4); continuous supplemental oxygen only (level 5); Continuous Positive Airway Pressure (CPAP) ventilation, Bi-Level Positive Airway Pressure or High Flow Nasal Oxygen (HFNO) (level 6); Invasive Mechanical Ventilation (IMV), Extra-Corporeal Membrane Oxygenation (ECMO) and acute Renal Replacement Therapy (RRT) (levels 7-9). Cell counts <5 and related sub-totals have been suppressed.

**Table S10 Patient characteristics available at the research visit, stratified by breathlessness at the research visit (PSQ)**

|                                     | Total N      | Levels       | Not breathless         | Breathless             | Total                  |
|-------------------------------------|--------------|--------------|------------------------|------------------------|------------------------|
| Total N (%)                         |              |              | 675 (55.1)             | 551 (44.9)             | 1226                   |
| Discharge to review period (months) | 1226 (100.0) | Median (IQR) | 4.8 (3.4 to 6.0)       | 4.5 (3.3 to 6.0)       | 4.7 (3.4 to 6.0)       |
| PHQ9 total score                    | 1188 (96.9)  | Median (IQR) | 3.0 (1.0 to 7.0)       | 9.0 (4.0 to 15.0)      | 5.0 (2.0 to 11.0)      |
| GAD7 total score                    | 1187 (96.8)  | Median (IQR) | 2.0 (0.0 to 6.0)       | 6.0 (1.0 to 12.0)      | 3.0 (0.0 to 8.0)       |
| PCL-5 Total Severity Score          | 1184 (96.6)  | Median (IQR) | 6.0 (2.0 to 14.0)      | 18.0 (7.0 to 35.0)     | 9.0 (3.0 to 23.0)      |
| CRP                                 | 800 (65.3)   | Median (IQR) | 4.0 (1.1 to 5.0)       | 4.0 (2.0 to 5.7)       | 4.0 (1.8 to 5.0)       |
| BNP/NT-Pro-BNP ng/L >threshold      | 642 (52.4)   | No           | 330 (48.9)             | 267 (48.5)             | 597 (48.7)             |
|                                     |              | Yes          | 21 (3.1)               | 24 (4.4)               | 45 (3.7)               |
|                                     |              | (Missing)    | 324 (48.0)             | 260 (47.2)             | 584 (47.6)             |
| Haemoglobin level All (g/dL)        | 861 (70.2)   | Median (IQR) | 14.4 (13.4 to 15.3)    | 13.9 (13.0 to 14.9)    | 14.2 (13.2 to 15.2)    |
| Haemoglobin level male (g/dL)       | 537 (43.8)   | Median (IQR) | 14.8 (13.9 to 15.6)    | 14.5 (13.6 to 15.5)    | 14.7 (13.8 to 15.5)    |
| Haemoglobin level female (g/dL)     | 324 (26.4)   | Median (IQR) | 13.5 (12.9 to 14.2)    | 13.3 (12.6 to 14.0)    | 13.4 (12.7 to 14.1)    |
| ISWT distance (m)                   | 737 (60.1)   | Median (IQR) | 460.0 (300.0 to 650.0) | 320.0 (200.0 to 460.0) | 380.0 (257.5 to 570.0) |
| ISWT % predicted                    | 658 (53.7)   | Median (IQR) | 62.4 (45.4 to 84.5)    | 48.1 (30.8 to 67.8)    | 56.3 (37.9 to 75.9)    |
| Oxygen saturations post ISWT (%)    | 727 (59.3)   | Median (IQR) | 96.0 (94.0 to 98.0)    | 96.0 (93.0 to 98.0)    | 96.0 (94.0 to 98.0)    |
| Borg leg fatigue score post ISWT    | 722 (58.9)   | Median (IQR) | 2.0 (0.5 to 3.0)       | 3.0 (2.0 to 5.0)       | 3.0 (1.0 to 4.0)       |
| FEV1 (L)                            | 748 (61.0)   | Median (IQR) | 2.9 (2.5 to 3.4)       | 2.5 (2.0 to 3.2)       | 2.8 (2.2 to 3.3)       |
| FEV1 % predicted                    | 683 (55.7)   | Median (IQR) | 95.1 (85.3 to 106.8)   | 87.2 (74.9 to 99.3)    | 91.7 (79.7 to 103.7)   |
| FEV1 < LLN                          | 683 (55.7)   | No           | 321 (88.4)             | 237 (74.1)             | 558 (81.7)             |
|                                     |              | Yes          | 42 (11.6)              | 83 (25.9)              | 125 (18.3)             |
| FVC (L)                             | 746 (60.8)   | Median (IQR) | 3.6 (3.0 to 4.4)       | 3.1 (2.5 to 3.9)       | 3.5 (2.8 to 4.2)       |
| FVC % predicted                     | 681 (55.5)   | Median (IQR) | 94.0 (83.4 to 105.7)   | 84.8 (73.1 to 97.3)    | 90.0 (78.2 to 102.4)   |
| FVC < LLN                           | 681 (55.5)   | No           | 316 (87.5)             | 220 (68.8)             | 536 (78.7)             |
|                                     |              | Yes          | 45 (12.5)              | 100 (31.2)             | 145 (21.3)             |
| FEV1/FVC expressed as a %           | 736 (60.0)   | Median (IQR) | 80.0 (75.7 to 84.8)    | 81.0 (76.4 to 85.9)    | 80.6 (76.0 to 85.5)    |
| FEV1/FVC < LLN                      | 673 (54.9)   | No           | 341 (95.5)             | 296 (93.7)             | 637 (94.7)             |
|                                     |              | Yes          | 16 (4.5)               | 20 (6.3)               | 36 (5.3)               |
| TLCO                                | 272 (22.2)   | Median (IQR) | 7.7 (6.6 to 8.9)       | 6.5 (5.5 to 8.1)       | 7.3 (6.1 to 8.4)       |
| TLCO % predicted                    | 252 (20.6)   | Median (IQR) | 93.5 (80.0 to 105.0)   | 88.1 (74.0 to 100.4)   | 90.7 (76.8 to 103.2)   |
| TLCO predicted <80%                 | 252 (20.6)   | No           | 101 (74.8)             | 75 (64.1)              | 176 (69.8)             |
|                                     |              | Yes          | 34 (25.2)              | 42 (35.9)              | 76 (30.2)              |

|                                                                                                                                                                                                                                                                                                                                                                                                                                                                                                                                                                                                                                                   | <b>Total N</b> | <b>Levels</b> | <b>Not breathless</b> | <b>Breathless</b>     | <b>Total</b>          |
|---------------------------------------------------------------------------------------------------------------------------------------------------------------------------------------------------------------------------------------------------------------------------------------------------------------------------------------------------------------------------------------------------------------------------------------------------------------------------------------------------------------------------------------------------------------------------------------------------------------------------------------------------|----------------|---------------|-----------------------|-----------------------|-----------------------|
| KCO                                                                                                                                                                                                                                                                                                                                                                                                                                                                                                                                                                                                                                               | 276 (22.5)     | Median (IQR)  | 1.5 (1.3 to 1.6)      | 1.5 (1.2 to 1.7)      | 1.5 (1.3 to 1.6)      |
| KCO % predicted                                                                                                                                                                                                                                                                                                                                                                                                                                                                                                                                                                                                                                   | 259 (21.1)     | Median (IQR)  | 103.0 (91.9 to 108.9) | 100.2 (86.8 to 112.6) | 101.8 (89.2 to 110.1) |
| KCO predicted <80%                                                                                                                                                                                                                                                                                                                                                                                                                                                                                                                                                                                                                                | 259 (21.1)     | No            | 124 (91.9)            | 115 (92.7)            | 239 (92.3)            |
|                                                                                                                                                                                                                                                                                                                                                                                                                                                                                                                                                                                                                                                   |                | Yes           | 11 (8.1)              | 9 (7.3)               | 20 (7.7)              |
| <p>Breathlessness at the research visit was taken as a PSQ &lt;3 as “not breathless” and a PSQ of <math>\geq</math> 3 as a “breathless”. PHQ-9 = Patient Health Questionnaire-9, GAD-7 = General Anxiety Disorder-7, PCL-5 = Posttraumatic Stress Disorder Checklist, CRP = C-reactive Protein, BNP = Brain Natriuretic Peptide, NT-Pro-BNP = N-terminal-pro hormone BNP, ISWT = Incremental Shuttle Walk Test, FEV1 = Forced Expiratory Volume in 1 second, LLN = Lower Limit of Normal, FVC = Forced Vital Capacity, TLCO = Transfer Capacity of the lung, KCO = Carbon monoxide transfer coefficient, PSQ = Patient Symptom Questionnaire.</p> |                |               |                       |                       |                       |

**Table S11 Multivariable logistic regression with breathlessness at research visit (PSQ) as the dependent variable**

Consistent with results from the primary outcome, the most deprived quintile, female sex, pre-existing depression/anxiety, and admission duration were associated with PSQ breathlessness at the research visit. Individuals of Black ethnicity and participants aged 60 years or older were less likely to report breathlessness than the reference group. PSQ breathlessness before admission was also associated with PSQ breathlessness at the research visit.

| Dependent: Breathlessness at research visit (PSQ) |                    | Not breathless | Breathless  | OR (univariable)          | OR (multivariable)        |
|---------------------------------------------------|--------------------|----------------|-------------|---------------------------|---------------------------|
| Sex at birth                                      | Male               | 459 (59.8)     | 309 (40.2)  | -                         | -                         |
|                                                   | Female             | 216 (47.2)     | 242 (52.8)  | 1.66 (1.32-2.10, p<0.001) | 1.37 (1.03-1.83, p=0.032) |
| Age at admission (years)                          | 50-59              | 176 (49.7)     | 178 (50.3)  | -                         | -                         |
|                                                   | <30                | 15 (60.0)      | 10 (40.0)   | 0.66 (0.28-1.49, p=0.323) | 0.71 (0.25-1.94, p=0.516) |
|                                                   | 30-39              | 47 (59.5)      | 32 (40.5)   | 0.67 (0.41-1.10, p=0.117) | 0.72 (0.40-1.28, p=0.273) |
|                                                   | 40-49              | 115 (60.5)     | 75 (39.5)   | 0.64 (0.45-0.92, p=0.016) | 0.81 (0.53-1.24, p=0.335) |
|                                                   | 60-69              | 191 (53.5)     | 166 (46.5)  | 0.86 (0.64-1.15, p=0.313) | 0.68 (0.47-0.97, p=0.035) |
|                                                   | 70-79              | 102 (60.7)     | 66 (39.3)   | 0.64 (0.44-0.93, p=0.019) | 0.51 (0.31-0.81, p=0.005) |
|                                                   | 80+                | 22 (55.0)      | 18 (45.0)   | 0.81 (0.42-1.56, p=0.527) | 0.67 (0.29-1.53, p=0.343) |
| Index of Multiple Deprivation                     | 5 - least deprived | 141 (61.3)     | 89 (38.7)   | -                         | -                         |
|                                                   | 4                  | 131 (61.2)     | 83 (38.8)   | 1.00 (0.68-1.47, p=0.985) | 1.27 (0.81-1.99, p=0.302) |
|                                                   | 3                  | 128 (56.1)     | 100 (43.9)  | 1.24 (0.85-1.80, p=0.262) | 1.30 (0.84-2.03, p=0.241) |
|                                                   | 2                  | 141 (53.0)     | 125 (47.0)  | 1.40 (0.98-2.01, p=0.063) | 1.52 (0.99-2.36, p=0.056) |
|                                                   | 1 - most deprived  | 125 (47.0)     | 141 (53.0)  | 1.79 (1.25-2.56, p=0.001) | 1.95 (1.26-3.04, p=0.003) |
| Ethnicity                                         | White              | 456 (52.2)     | 417 (47.8)  | -                         | -                         |
|                                                   | South Asian        | 95 (62.1)      | 58 (37.9)   | 0.67 (0.47-0.95, p=0.025) | 0.87 (0.55-1.37, p=0.560) |
|                                                   | Black              | 58 (63.0)      | 34 (37.0)   | 0.64 (0.41-0.99, p=0.049) | 0.58 (0.34-0.99, p=0.049) |
|                                                   | Mixed              | 19 (57.6)      | 14 (42.4)   | 0.81 (0.39-1.62, p=0.547) | 0.76 (0.31-1.79, p=0.536) |
|                                                   | Other              | 34 (65.4)      | 18 (34.6)   | 0.58 (0.32-1.03, p=0.068) | 0.54 (0.25-1.10, p=0.096) |
| BMI                                               | Mean (SD)          | 30.9 (6.6)     | 33.3 (7.5)  | 1.05 (1.03-1.07, p<0.001) | 1.12 (1.00-1.26, p=0.052) |
| Number of comorbidities                           | Mean (SD)          | 1.7 (1.8)      | 2.6 (2.4)   | 1.24 (1.16-1.32, p<0.001) | 1.05 (0.96-1.16, p=0.285) |
| Pre-existing depression or anxiety                | No                 | 598 (59.3)     | 411 (40.7)  | -                         | -                         |
|                                                   | Yes                | 67 (33.8)      | 131 (66.2)  | 2.84 (2.07-3.94, p<0.001) | 1.72 (1.10-2.71, p=0.019) |
| Pre-existing respiratory condition                | No                 | 534 (59.8)     | 359 (40.2)  | -                         | -                         |
|                                                   | Yes                | 141 (42.3)     | 192 (57.7)  | 2.03 (1.57-2.62, p<0.001) | 1.19 (0.85-1.68, p=0.307) |
| Smoking                                           | Never              | 407 (59.1)     | 282 (40.9)  | -                         | -                         |
|                                                   | Ex-smoker          | 253 (50.0)     | 253 (50.0)  | 1.44 (1.15-1.82, p=0.002) | 1.21 (0.91-1.61, p=0.198) |
|                                                   | Current smoker     | 8 (44.4)       | 10 (55.6)   | 1.80 (0.70-4.78, p=0.220) | 1.17 (0.36-3.94, p=0.795) |
| Breathlessness before admission (PSQ)             | Mean (SD)          | 0.6 (1.5)      | 1.8 (2.4)   | 1.37 (1.28-1.47, p<0.001) | 1.33 (1.22-1.45, p<0.001) |
| Admission duration (days)                         | Mean (SD)          | 13.5 (18.1)    | 17.3 (21.8) | 1.01 (1.00-1.02, p=0.001) | 1.01 (1.00-1.02, p=0.024) |
| WHO clinical progression scale                    | WHO – class 3-4    | 126 (56.5)     | 97 (43.5)   | -                         | -                         |
|                                                   | WHO – class 5      | 271 (56.8)     | 206 (43.2)  | 0.99 (0.72-1.36, p=0.938) | 0.86 (0.58-1.30, p=0.478) |
|                                                   | WHO – class 6      | 144 (56.2)     | 112 (43.8)  | 1.01 (0.70-1.45, p=0.956) | 0.88 (0.55-1.39, p=0.570) |
|                                                   | WHO – class 7-9    | 134 (49.6)     | 136 (50.4)  | 1.32 (0.92-1.88, p=0.128) | 1.18 (0.68-2.03, p=0.553) |

| <b>Dependent: Breathlessness at research visit (PSQ)</b> | <b>Not breathless</b> | <b>Breathless</b> | <b>OR (univariable)</b> | <b>OR (multivariable)</b> |
|----------------------------------------------------------|-----------------------|-------------------|-------------------------|---------------------------|
|----------------------------------------------------------|-----------------------|-------------------|-------------------------|---------------------------|

BMI = Body Mass Index. PSQ = Patient Symptom Questionnaire. World Health Organization (WHO) clinical progression scale: not requiring continuous supplemental oxygen (levels 3-4); continuous supplemental oxygen only (level 5); Continuous Positive Airway Pressure (CPAP) ventilation, Bi-Level Positive Airway Pressure or High Flow Nasal Oxygen (HFNO) (level 6); Invasive Mechanical Ventilation (IMV), Extra-Corporeal Membrane Oxygenation (ECMO) and acute Renal Replacement Therapy (RRT) (levels 7-9). The logistic regression model was also adjusted for BMI<sup>2</sup>. Breathlessness at the research visit was taken as a PSQ <3 as “not breathless” and a PSQ of ≥ 3 as “breathless”.

### Sensitivity analyses: PSQ breathlessness at the research visit assessed in a multinomial model

As a further sensitivity analysis, we repeated the multinomial modelling using the PSQ breathlessness score reported at the research visit as the outcome (taking a PSQ of less than 3 as “not breathless”; a PSQ 3 – 6 as “mildly breathless” and a PSQ of greater or equal to 7 as a “severely breathless”) as a complete case analysis.

The most deprived quintiles, female sex, and admission duration were associated with *severe* breathlessness at the research visit, in addition to number of co-morbidities. Pre-existing depression/anxiety and pre-existing respiratory condition were associated with *mild* but not *severe* breathlessness. Individuals of Black ethnicity were less likely to report *mild* breathlessness. Participants aged 60 to 79 years were less likely to report *severe* breathlessness than the reference group.

**Table S12 Multinomial logistic regression for PSQ breathlessness at the research visit**

| Dependent: Breathlessness at follow-up visit                                                                                 |                    | OR (95% CI)       |                     |
|------------------------------------------------------------------------------------------------------------------------------|--------------------|-------------------|---------------------|
|                                                                                                                              |                    | Mildly breathless | Severely breathless |
| Sex at birth                                                                                                                 | Male               | 1.00              | 1.00                |
|                                                                                                                              | Female             | 1.23 (0.90-1.67)  | 1.81 (1.21-2.71)    |
| Age at admission (years)                                                                                                     | 50-59              | 1.00              | 1.00                |
|                                                                                                                              | <30                | 0.68 (0.22-2.10)  | 0.84 (0.23-3.12)    |
|                                                                                                                              | 30-39              | 0.94 (0.51-1.72)  | 0.28 (0.10-0.78)    |
|                                                                                                                              | 40-49              | 0.88 (0.55-1.40)  | 0.55 (0.30-1.01)    |
|                                                                                                                              | 60-69              | 0.99 (0.68-1.46)  | 0.53 (0.32-0.88)    |
|                                                                                                                              | 70-79              | 0.82 (0.50-1.35)  | 0.22 (0.10-0.47)    |
|                                                                                                                              | 80+                | 1.04 (0.44-2.44)  | 0.52 (0.17-1.61)    |
| Index of Multiple Deprivation                                                                                                | 5 - least deprived | 1.00              | 1.00                |
|                                                                                                                              | 4                  | 1.14 (0.71-1.80)  | 1.51 (0.69-3.31)    |
|                                                                                                                              | 3                  | 1.07 (0.67-1.70)  | 2.52 (1.23-5.18)    |
|                                                                                                                              | 2                  | 1.26 (0.81-1.97)  | 3.02 (1.49-6.12)    |
|                                                                                                                              | 1 - most deprived  | 1.39 (0.87-2.21)  | 4.82 (2.42-9.60)    |
| Ethnicity                                                                                                                    | White              | 1.00              | 1.00                |
|                                                                                                                              | South Asian        | 0.78 (0.48-1.26)  | 0.77 (0.40-1.51)    |
|                                                                                                                              | Black              | 0.42 (0.22-0.81)  | 0.89 (0.45-1.75)    |
|                                                                                                                              | Mixed              | 0.67 (0.25-1.81)  | 1.01 (0.33-3.07)    |
|                                                                                                                              | Other              | 0.47 (0.21-1.08)  | 0.98 (0.38-2.51)    |
| BMI (kg/m <sup>2</sup> )                                                                                                     | -                  | 1.03 (1.01-1.06)  | 1.01 (0.98-1.04)    |
| Number of comorbidities                                                                                                      | -                  | 1.09 (0.99-1.20)  | 1.26 (1.12-1.42)    |
| Pre-existing respiratory condition                                                                                           | No                 | 1.00              | 1.00                |
|                                                                                                                              | Yes                | 1.54 (1.09-2.19)  | 1.54 (0.98-2.44)    |
| Pre-existing depression or anxiety                                                                                           | No                 | 1.00              | 1.00                |
|                                                                                                                              | Yes                | 1.76 (1.10-2.81)  | 1.14 (0.62-2.09)    |
| Admission duration (days)                                                                                                    | -                  | 1.00 (0.99-1.01)  | 1.02 (1.00-1.03)    |
| WHO clinical progression scale                                                                                               | WHO – class 3-4    | 1.00              | 1.00                |
|                                                                                                                              | WHO – class 5      | 0.87 (0.57-1.34)  | 0.89 (0.50-1.59)    |
|                                                                                                                              | WHO – class 6      | 1.08 (0.67-1.75)  | 0.47 (0.23-0.98)    |
|                                                                                                                              | WHO – class 7-9    | 1.18 (0.65-2.13)  | 1.06 (0.50-2.25)    |
| The reference group (not shown) was the Not breathless group (n=675). Mildly breathless (n=364), Severely breathless (n=187) |                    |                   |                     |

**Sensitivity analyses: Dyspnoea 12 score at the research visit as a linear outcome**

Figure S7 demonstrates the relationship between breathlessness reported at the research visit as recorded using the PSQ and Dyspnoea-12 scores.

**Figure S7 Relationship of PSQ breathlessness and Dyspnoea 12 score collected at the research visit**

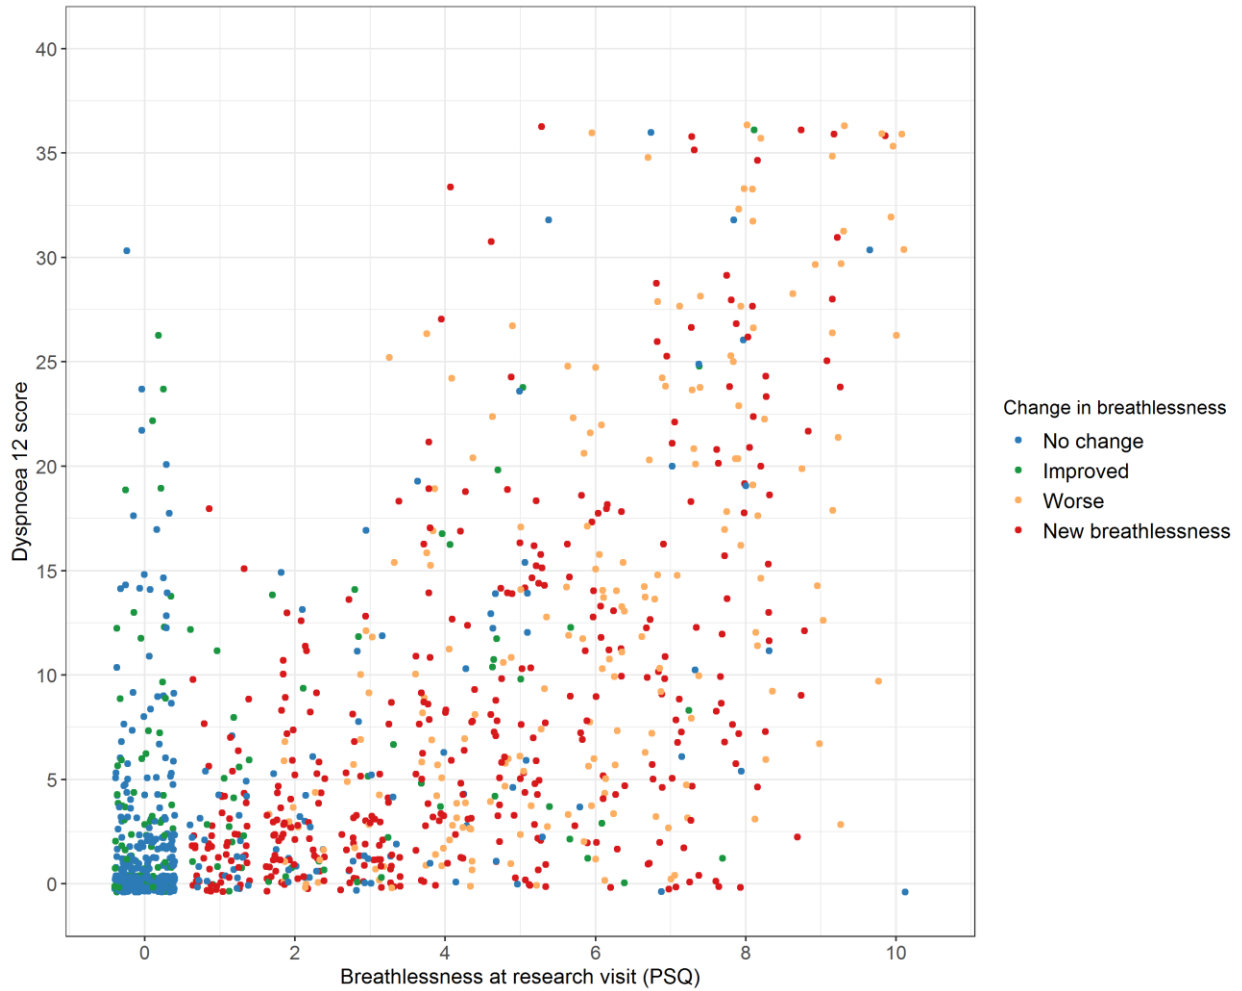



**Table S13 Linear regression model - Dyspnoea 12 at the research visit**

When breathlessness at the research visit, as recorded by Dyspnoea-12, was used as the dependent variable in a linear regression (Table S11), the most deprived quintile, female sex, admission duration, pre-existing respiratory condition, depression/anxiety and breathlessness prior to COVID-19 were significantly associated with a higher Dyspnoea-12 score. Participants 60 years or older were less likely to report breathlessness compared to the reference group.

| Dependent: Dyspnoea-12 score          |                    | Value       | Coefficient (univariable)       | Coefficient (multivariable)     |
|---------------------------------------|--------------------|-------------|---------------------------------|---------------------------------|
| Sex at birth                          | Male               | 5.5 (7.9)   | 5.5 (7.9)                       | -                               |
|                                       | Female             | 7.7 (8.9)   | 7.7 (8.9)                       | 2.26 (1.27 to 3.25, p<0.001)    |
| Age at admission (years)              | 50-59              | 7.5 (9.2)   | -                               | -                               |
|                                       | <30                | 6.0 (6.6)   | -1.50 (-4.93 to 1.92, p=0.390)  | -3.41 (-6.84 to 0.03, p=0.052)  |
|                                       | 30-39              | 5.2 (7.5)   | -2.25 (-4.36 to -0.15, p=0.036) | -2.59 (-4.70 to -0.49, p=0.016) |
|                                       | 40-49              | 5.6 (7.7)   | -1.95 (-3.46 to -0.45, p=0.011) | -1.56 (-3.09 to -0.03, p=0.046) |
|                                       | 60-69              | 6.0 (7.9)   | -1.49 (-2.74 to -0.24, p=0.020) | -2.14 (-3.43 to -0.85, p=0.001) |
|                                       | 70-79              | 5.5 (8.4)   | -1.98 (-3.52 to -0.43, p=0.012) | -2.94 (-4.58 to -1.30, p<0.001) |
|                                       | 80+                | 4.8 (7.4)   | -2.69 (-5.46 to 0.09, p=0.058)  | -4.09 (-7.00 to -1.18, p=0.006) |
| Index of Multiple Deprivation         | 5 - least deprived | 4.9 (6.7)   | -                               | -                               |
|                                       | 4                  | 4.6 (6.3)   | -0.34 (-1.89 to 1.20, p=0.664)  | 0.18 (-1.40 to 1.75, p=0.825)   |
|                                       | 3                  | 6.5 (8.7)   | 1.62 (0.09 to 3.15, p=0.038)    | 1.32 (-0.24 to 2.87, p=0.097)   |
|                                       | 2                  | 6.4 (8.5)   | 1.50 (0.02 to 2.98, p=0.048)    | 1.13 (-0.40 to 2.66, p=0.148)   |
|                                       | 1 - most deprived  | 8.1 (9.8)   | 3.23 (1.75 to 4.71, p<0.001)    | 3.13 (1.58 to 4.68, p<0.001)    |
| Ethnicity                             | White              | 6.3 (8.2)   | -                               | -                               |
|                                       | South Asian        | 5.9 (8.7)   | -0.46 (-1.93 to 1.01, p=0.540)  | 0.38 (-1.21 to 1.98, p=0.637)   |
|                                       | Black              | 7.5 (10.0)  | 1.15 (-0.74 to 3.03, p=0.233)   | 1.10 (-0.83 to 3.03, p=0.265)   |
|                                       | Mixed              | 4.8 (7.6)   | -1.56 (-4.56 to 1.43, p=0.306)  | -1.17 (-4.22 to 1.88, p=0.451)  |
|                                       | Other              | 4.8 (7.2)   | -1.55 (-4.03 to 0.93, p=0.219)  | -0.51 (-3.11 to 2.09, p=0.700)  |
| BMI                                   | [16.5,77.8]        | 6.2 (8.3)   | 0.17 (0.09 to 0.24, p<0.001)    | 0.26 (-0.14 to 0.65, p=0.201)   |
| Number of comorbidities               | [0.0,17.0]         | 6.2 (8.3)   | 0.87 (0.64 to 1.11, p<0.001)    | 0.11 (-0.22 to 0.43, p=0.525)   |
| Pre-existing depression or anxiety    | No                 | 5.7 (8.0)   | -                               | -                               |
|                                       | Yes                | 9.7 (9.8)   | 4.06 (2.75 to 5.37, p<0.001)    | 2.05 (0.44 to 3.65, p=0.013)    |
| Pre-existing respiratory condition    | No                 | 5.0 (7.3)   | -                               | -                               |
|                                       | Yes                | 9.7 (10.0)  | 4.70 (3.65 to 5.75, p<0.001)    | 2.46 (1.24 to 3.68, p<0.001)    |
| Smoking                               | Never              | 5.9 (8.2)   | -                               | -                               |
|                                       | Ex-smoker          | 6.7 (8.4)   | 0.82 (-0.16 to 1.80, p=0.101)   | 0.34 (-0.68 to 1.36, p=0.513)   |
|                                       | Current smoker     | 10.4 (10.2) | 4.58 (0.45 to 8.71, p=0.030)    | 3.69 (-0.73 to 8.12, p=0.102)   |
| Breathlessness before admission (PSQ) | [0.0,10.0]         | 6.3 (8.4)   | 1.25 (1.02 to 1.47, p<0.001)    | 0.88 (0.60 to 1.15, p<0.001)    |
| Admission duration (days)             | [0.0,171.0]        | 6.3 (8.4)   | 0.02 (-0.00 to 0.05, p=0.081)   | 0.03 (0.00 to 0.06, p=0.034)    |
| WHO clinical progression scale        | WHO – class 3-4    | 6.8 (8.3)   | -                               | -                               |
|                                       | WHO – class 5      | 6.0 (8.2)   | -0.80 (-2.17 to 0.57, p=0.250)  | -0.95 (-2.36 to 0.46, p=0.185)  |
|                                       | WHO – class 6      | 6.4 (8.6)   | -0.37 (-1.91 to 1.18, p=0.642)  | -0.57 (-2.19 to 1.05, p=0.488)  |
|                                       | WHO – class 7-9    | 6.2 (8.4)   | -0.61 (-2.13 to 0.92, p=0.436)  | -1.06 (-2.99 to 0.87, p=0.280)  |

BMI = Body Mass Index. PSQ = Patient Symptom Questionnaire. World Health Organization (WHO) clinical progression scale: not requiring continuous supplemental oxygen (levels 3-4); continuous supplemental oxygen only (level 5); Continuous Positive Airway Pressure (CPAP) ventilation, Bi-Level Positive Airway Pressure or High Flow Nasal Oxygen (HFNO) (level 6); Invasive Mechanical Ventilation (IMV), Extra-Corporeal Membrane Oxygenation (ECMO) and acute Renal Replacement Therapy (RRT) (levels 7-9). The linear regression model was also adjusted for BMI<sup>2</sup>.

## Reporting guidelines

The manuscript was guided by the Strengthening the Reporting of Observational Studies in Epidemiology checklist (Table S3) [2] and the Transparent reporting of a multivariable prediction model for individual prognosis or diagnosis (Table S4) [3].

**Table S14 STROBE Statement—Checklist of items that should be included in reports of cohort studies [2]**

|                              | Item. | Recommendation                                                                                                                                                                                                                                                                                                                                                                                                | Page No.                                                 |
|------------------------------|-------|---------------------------------------------------------------------------------------------------------------------------------------------------------------------------------------------------------------------------------------------------------------------------------------------------------------------------------------------------------------------------------------------------------------|----------------------------------------------------------|
| <b>Title and abstract</b>    | 1     | (a) Indicate the study's design with a commonly used term in the title or the abstract<br>(b) Provide in the abstract an informative and balanced summary                                                                                                                                                                                                                                                     | Title page<br>Page 1                                     |
| <b>Introduction</b>          |       |                                                                                                                                                                                                                                                                                                                                                                                                               |                                                          |
| Background/rationale         | 2     | Explain the scientific background and rationale for the investigation being reported                                                                                                                                                                                                                                                                                                                          | Page 2                                                   |
| Objectives                   | 3     | State specific objectives, including any prespecified hypotheses                                                                                                                                                                                                                                                                                                                                              | Page 2                                                   |
| <b>Methods</b>               |       |                                                                                                                                                                                                                                                                                                                                                                                                               |                                                          |
| Study design                 | 4     | Present key elements of study design early in the paper                                                                                                                                                                                                                                                                                                                                                       | Page 2                                                   |
| Setting                      | 5     | Describe the setting, locations, and relevant dates, including periods of recruitment, exposure, follow-up, and data collection                                                                                                                                                                                                                                                                               | Page 2-3                                                 |
| Participants                 | 6     | (a) Give the eligibility criteria, and the sources and methods of selection of participants. Describe methods of follow-up<br>(b) For matched studies, give matching criteria and number of exposed and unexposed                                                                                                                                                                                             | Page 2<br>-                                              |
| Variables                    | 7     | Clearly define all outcomes, exposures, predictors, potential confounders, and effect modifiers. Give diagnostic criteria, if applicable                                                                                                                                                                                                                                                                      | Page 3                                                   |
| Data sources/<br>measurement | 8*    | For each variable of interest, give sources of data and details of methods of assessment (measurement). Describe comparability of assessment methods if more than one group                                                                                                                                                                                                                                   | Page 3                                                   |
| Bias                         | 9     | Describe any efforts to address potential sources of bias                                                                                                                                                                                                                                                                                                                                                     | Page 8-9                                                 |
| Study size                   | 10    | Explain how the study size was arrived at                                                                                                                                                                                                                                                                                                                                                                     | Page 2-3                                                 |
| Quantitative<br>variables    | 11    | Explain how quantitative variables were handled in the analyses. If applicable, describe which groupings were chosen and why                                                                                                                                                                                                                                                                                  | Page 3-4                                                 |
| Statistical methods          | 12    | (a) Describe all statistical methods, including those used to control for confounding<br>(b) Describe any methods used to examine subgroups and interactions<br>(c) Explain how missing data were addressed<br>(d) If applicable, explain how loss to follow-up was addressed<br>(e) Describe any sensitivity analyses                                                                                        | Page 3-4<br>Page 4<br>Page 4<br>-<br>Page 3              |
| <b>Results</b>               |       |                                                                                                                                                                                                                                                                                                                                                                                                               |                                                          |
| Participants                 | 13*   | (a) Report numbers of individuals at each stage of study—e.g. numbers potentially eligible, examined for eligibility, confirmed eligible, included in the study, completing follow-up, and analysed<br>(b) Give reasons for non-participation at each stage<br>(c) Consider use of a flow diagram                                                                                                             | Page 4-5<br>Page 2,4<br>Figure 1                         |
| Descriptive data             | 14*   | (a) Give characteristics of study participants (eg demographic, clinical, social) and information on exposures and potential confounders<br>(b) Indicate number of participants with missing data for each variable of interest<br>(c) Summarise follow-up time (e.g., average and total amount)                                                                                                              | Page 5;<br>Table 1-3<br>Page 4-5;<br>Table 1-3<br>Page 4 |
| Outcome data                 | 15*   | Report numbers of outcome events or summary measures over time                                                                                                                                                                                                                                                                                                                                                | Page 5                                                   |
| Main results                 | 16    | (a) Give unadjusted estimates and, if applicable, confounder-adjusted estimates and their precision (eg, 95% confidence interval). Make clear which confounders were adjusted for and why they were included<br>(b) Report category boundaries when continuous variables were categorized<br>(c) If relevant, consider translating estimates of relative risk into absolute risk for a meaningful time period | Page 5-6;<br>Table 4<br>Page 5,<br>Table 1<br>-          |
| Other analyses               | 17    | Report other analyses done—analyses of subgroups and interactions, and sensitivity analyses                                                                                                                                                                                                                                                                                                                   | Page 5-6                                                 |
| <b>Discussion</b>            |       |                                                                                                                                                                                                                                                                                                                                                                                                               |                                                          |
| Key results                  | 18    | Summarise key results with reference to study objectives                                                                                                                                                                                                                                                                                                                                                      | Page 7                                                   |
| Limitations                  | 19    | Discuss limitations of the study, taking into account sources of potential bias or imprecision. Discuss both direction and magnitude of any potential bias                                                                                                                                                                                                                                                    | Page 8-9                                                 |
| Interpretation               | 20    | Give a cautious overall interpretation of results considering objectives, limitations, multiplicity of analyses, results from similar studies, and other relevant evidence                                                                                                                                                                                                                                    | Page 7-8                                                 |
| Generalisability             | 21    | Discuss the generalisability (external validity) of the study results                                                                                                                                                                                                                                                                                                                                         | Page 8                                                   |
| <b>Other information</b>     |       |                                                                                                                                                                                                                                                                                                                                                                                                               |                                                          |
| Funding                      | 22    | Give the source of funding and the role of the funders for the present study and, if applicable, for the original study on which the present article is based                                                                                                                                                                                                                                                 | Page 10                                                  |

**Table S15 TRIPOD reporting guidelines checklist [3]**

| Domain                       |     | Reporting Item                                                                                                                                                                                        | Page Number             |
|------------------------------|-----|-------------------------------------------------------------------------------------------------------------------------------------------------------------------------------------------------------|-------------------------|
| <b>Title</b>                 |     |                                                                                                                                                                                                       |                         |
|                              | 1   | Identify the study as developing and / or validating a multivariable prediction model, the target population, and the outcome to be predicted.                                                        | Title                   |
| <b>Abstract</b>              |     |                                                                                                                                                                                                       |                         |
|                              | 2   | Provide a summary of objectives, study design, setting, participants, sample size, predictors, outcome, statistical analysis, results, and conclusions.                                               | Page 1                  |
| <b>Introduction</b>          |     |                                                                                                                                                                                                       |                         |
|                              | 3a  | Explain the medical context (including whether diagnostic or prognostic) and rationale for developing or validating the multivariable prediction model, including references to existing models.      | Page 2                  |
|                              | 3b  | Specify the objectives, including whether the study describes the development or validation of the model or both.                                                                                     | Page 2                  |
| <b>Methods</b>               |     |                                                                                                                                                                                                       |                         |
| Source of data               | 4a  | Describe the study design or source of data (e.g., randomized trial, cohort, or registry data), separately for the development and validation data sets, if applicable.                               | Page 2-3                |
| Source of data               | 4b  | Specify the key study dates, including start of accrual; end of accrual; and, if applicable, end of follow-up.                                                                                        | Page 2-3                |
| Participants                 | 5a  | Specify key elements of the study setting (e.g., primary care, secondary care, general population) including number and location of centres.                                                          | Page 2-3                |
| Participants                 | 5b  | Describe eligibility criteria for participants.                                                                                                                                                       | Page 2-3                |
| Participants                 | 5c  | Give details of treatments received, if relevant                                                                                                                                                      | Page 2-3                |
| Outcome                      | 6a  | Clearly define the outcome that is predicted by the prediction model, including how and when assessed.                                                                                                | Page 4                  |
| Outcome                      | 6b  | Report any actions to blind assessment of the outcome to be predicted.                                                                                                                                | -                       |
| Predictors                   | 7a  | Clearly define all predictors used in developing or validating the multivariable prediction model, including how and when they were measured                                                          | Page 4                  |
| Predictors                   | 7b  | Report any actions to blind assessment of predictors for the outcome and other predictors.                                                                                                            | -                       |
| Sample size                  | 8   | Explain how the study size was arrived at.                                                                                                                                                            | Page 2-3                |
| Missing data                 | 9   | Describe how missing data were handled (e.g., complete-case analysis, single imputation, multiple imputation) with details of any imputation method.                                                  | Page 4                  |
| Statistical analysis methods | 10a | If you are developing a prediction model describe how predictors were handled in the analyses.                                                                                                        | Page 4                  |
| Statistical analysis methods | 10b | If you are developing a prediction model, specify type of model, all model-building procedures (including any predictor selection), and method for internal validation.                               | Page 4                  |
| Statistical analysis methods | 10c | If you are validating a prediction model, describe how the predictions were calculated.                                                                                                               | -                       |
| Statistical analysis methods | 10d | Specify all measures used to assess model performance and, if relevant, to compare multiple models.                                                                                                   | Page 4                  |
| Statistical analysis methods | 10e | If you are validating a prediction model, describe any model updating (e.g., recalibration) arising from the validation, if done                                                                      | -                       |
| Risk groups                  | 11  | Provide details on how risk groups were created, if done.                                                                                                                                             | -                       |
| Development vs. validation   | 12  | For validation, identify any differences from the development data in setting, eligibility criteria, outcome, and predictors.                                                                         | -                       |
| <b>Results</b>               |     |                                                                                                                                                                                                       |                         |
| Participants                 | 13a | Describe the flow of participants through the study, including the number of participants with and without the outcome and, if applicable, a summary of the follow-up time. A diagram may be helpful. | Page 4-5<br>Figure 1    |
| Participants                 | 13b | Describe the characteristics of the participants (basic demographics, clinical features, available predictors), including the number of participants with missing data for predictors and outcome.    | Page 4-5<br>Table 1-3   |
| Participants                 | 13c | For validation, show a comparison with the development data of the distribution of important variables (demographics, predictors and outcome).                                                        | -                       |
| Model development            | 14a | If developing a model, specify the number of participants and outcome events in each analysis.                                                                                                        | Page 4,<br>Table 4      |
| Model development            | 14b | If developing a model, report the unadjusted association, if calculated between each candidate predictor and outcome.                                                                                 | Table 4                 |
| Model specification          | 15a | If developing a model, present the full prediction model to allow predictions for individuals (i.e., all regression coefficients, and model intercept or baseline survival at a given time point).    | Table 4,<br>Equation E1 |
| Model specification          | 15b | If developing a prediction model, explain how to use it.                                                                                                                                              | Equation S1             |
| Model performance            | 16  | Report performance measures (with CIs) for the prediction model.                                                                                                                                      | Page 6                  |

|                           |     |                                                                                                                                                |            |
|---------------------------|-----|------------------------------------------------------------------------------------------------------------------------------------------------|------------|
| Model-updating            | 17  | If validating a model, report the results from any model updating, if done (i.e., model specification, model performance).                     | -          |
| <b>Discussion</b>         |     |                                                                                                                                                |            |
| Limitations               | 18  | Discuss any limitations of the study (such as non-representative sample, few events per predictor, missing data).                              | Page 8-9   |
| Interpretation            | 19a | For validation, discuss the results with reference to performance in the development data, and any other validation data                       | -          |
| Interpretation            | 19b | Give an overall interpretation of the results, considering objectives, limitations, results from similar studies, and other relevant evidence. | Page 7-8   |
| Implications              | 20  | Discuss the potential clinical use of the model and implications for future research                                                           | -          |
| <b>Other information</b>  |     |                                                                                                                                                |            |
| Supplementary information | 21  | Provide information about the availability of supplementary resources, such as study protocol, Web calculator, and data sets.                  | Page 10-12 |
| Funding                   | 22  | Give the source of funding and the role of the funders for the present study.                                                                  | Page 10    |

## References

---

S1 WHO Working Group on the Clinical Characterisation and Management of COVID-19 infection. A minimal common outcome measure set for COVID-19 clinical research. *Lancet Infect Dis.* 2020;20(8):e192-197.

S2 Von Elm E, Altman DG, Egger M, et al. The Strengthening the Reporting of Observational Studies in Epidemiology (STROBE) statement: guidelines for reporting observational studies. *Ann Intern Med.* 2007;147(8):573-577.

S3 Moons KG, Altman DG, Reitsma JB et al. Transparent Reporting of a multivariable prediction model for Individual Prognosis or Diagnosis (TRIPOD): explanation and elaboration. *Ann Intern Med.* 2015;162(1):W1-73.
